RESEARCH ARTICLE

# The role of the practice order: A systematic review about contextual interference in children

Judith V. Graser<sup>1,2,3\*</sup>, Caroline H. G. Bastiaenen<sup>3</sup>, Hubertus J. A. van Hedel<sup>1,2</sup>

**1** Paediatric Rehab Research Group, Rehabilitation Centre for Children and Adolescents, University Children's Hospital Zurich, Affoltern am Albis, Switzerland, **2** Children's Research Centre CRC, University Children's Hospital Zurich, Zurich, Switzerland, **3** Research Line Functioning and Rehabilitation CAPHRI, Department of Epidemiology, Maastricht University, Maastricht, the Netherlands

☞ These authors contributed equally to this work.

✉ Current address: Paediatric Rehab Research Group, Rehabilitation Centre for Children and Adolescents, University Children's Hospital Zurich, Affoltern am Albis, Switzerland

\* [judith.graser@kispi.uzh.ch](mailto:judith.graser@kispi.uzh.ch)

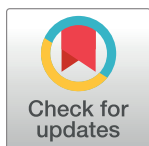

## Abstract

### Aim

We aimed to identify and evaluate the quality and evidence of the motor learning literature about intervention studies regarding the contextual interference (CI) effect (blocked vs. random practice order) in children with brain lesions and typically developing (TD) children.

### Method

Eight databases (Cinahl, Cochrane, Embase, PubMed, Pedro, PsycINFO, Scopus and Web of Knowledge) were searched systematically with predefined search terms. Controlled studies examining the CI effect in children (with brain lesions or TD) were included. Evidence level, conduct quality, and risk of bias were evaluated by two authors independently. A best evidence synthesis was performed.

### Results

Twenty-five papers evaluating TD children were included. One of these studies also assessed children with cerebral palsy. Evidence levels were I, II, or III. Conduct quality was low and the risk of bias high, due to methodological issues in the study designs or poor description thereof. Best evidence synthesis showed mainly no or conflicting evidence. Single tasks showed limited to moderate evidence supporting the CI effect in TD children.

### Conclusion

There is a severe limitation of good-quality evidence about the CI effect in children who practice different tasks in one session, especially in children with brain lesions.

## OPEN ACCESS

**Citation:** Graser JV, Bastiaenen CHG, van Hedel HJA (2019) The role of the practice order: A systematic review about contextual interference in children. PLoS ONE 14(1): e0209979. <https://doi.org/10.1371/journal.pone.0209979>

**Editor:** Ryan Roemmich, Kennedy Krieger Institute/ Johns Hopkins Medicine, UNITED STATES

**Received:** May 2, 2018

**Accepted:** December 14, 2018

**Published:** January 22, 2019

**Copyright:** © 2019 Graser et al. This is an open access article distributed under the terms of the [Creative Commons Attribution License](https://creativecommons.org/licenses/by/4.0/), which permits unrestricted use, distribution, and reproduction in any medium, provided the original author and source are credited.

**Data Availability Statement:** All relevant data are within the paper and its Supporting Information files.

**Funding:** This study has been funded by the Clinical Research Priority Programme (CRPP) Neuro- Rehabilitation of the University of Zurich and the Mäxi Foundation.

**Competing interests:** The authors have declared that no competing interests exist.

## Introduction

Children with brain lesions, such as cerebral palsy (CP), frequently have to deal with impairments of the sensorimotor system, leading to restrictions in activities and independence which could affect participation in daily life [1]. Intensive therapeutic interventions are needed to address these limitations. Usually, several tasks or skills are practiced during single therapeutic sessions to cover a broad range of impairments and limitations and to keep the children engaged. However, learning one skill can be influenced by practicing another one during the same session [2]. This so-called contextual interference effect [3] has been established by Battig and has been described later in various motor learning studies. These studies showed that the contextual interference effect was low when different tasks are practiced in a blocked order, meaning that one task is practiced until it is learned before moving to the next [4]. A high contextual interference effect is achieved if different tasks are practiced in a random order [4]. Most evidence about the contextual interference effect has been obtained in healthy young adults with the intent of improving practice schedules in sports. In this population, a low contextual interference effect results in better acquisition but worse transfer and retention of task performance. The findings are the opposite if practicing with high contextual interference [4,5].

For paediatric patients after rehabilitation discharge, it is important that learned tasks can be retained over time and generalised to other conditions or tasks. The evidence is lacking, though, whether this specific population would also benefit from a high contextual interference, and whether this can be achieved by practicing in a random order.

Several aspects seem to influence the contextual interference effect. Magill and Hall mentioned that task characteristics (e.g. non-laboratory tasks such as beanbag throwing vs. laboratory tasks such as coincident anticipation timing tasks) and subject characteristics like age or the level of experience are important, although it remains unclear how age exactly influences the contextual interference effect [5]. Therefore, it remains unclear what the optimal practice order in typically developing children (e.g., [6–8]) and in children with brain lesions undergoing neurorehabilitation is.

Some reviews about contextual interference exist [5,9–12], but none of them included a systematic evaluation regarding the effects and quality of intervention studies in the field of paediatric motor learning, which limits the relevance for the field of paediatric neurorehabilitation. This shortage of knowledge is unfortunate since neurorehabilitation is based on motor learning principles [13], and therapeutic interventions could be improved by adhering to such principles [14]. As we assume that results from contextual interference studies involving typically developing children could be better generalised to children with brain lesions compared to results obtained from healthy adults, the objective of this systematic review was to investigate the evidence of contextual interference in children with congenital or acquired brain lesions and typically developing children. The research question is the following: What is the evidence concerning the contextual interference effect for children with congenital or acquired brain injuries and typically developing children?

## Methods

This review was conducted by following certain aspects of the guidelines provided by the American Academy of Cerebral Palsy and Developmental Medicine (AACPDM) [15] and supplemented by the risk of bias tool provided by the Cochrane Collaboration [16]. The procedure is described in detail below.

Since no participants were required for this study, obtaining ethical approval was not necessary.

## Inclusion and exclusion criteria

We defined inclusion criteria in line with PICO (Population, Intervention, Control, Outcome) and included studies assessing children (with congenital or acquired brain injuries and/or typically developing) in the age range between 1 and 18 years (Population). We included motor learning studies examining the contextual interference effect with a random practice order group (Intervention) and at least one blocked practice order group (Control). Any outcome evaluating the acquisition, retention, and/or transfer of the learned skill (Outcome) was considered selectable. JG defined the search terms based on PICO and HVH reviewed the search terms. The following search terms were used:

**Population:** ‘child’, ‘children’, ‘childhood’, ‘paediatrics’, ‘adolescents’, ‘adolescence’, ‘youths’, ‘student’, ‘elementary’, ‘high school’.

**Intervention:** ‘motor learning’, ‘skill learning’, ‘contextual interference’, ‘practice order’;

**Control group:** ‘blocked and random’;

**Outcome:** ‘performance’, ‘acquisition’, ‘retention’, ‘transfer’, ‘generalisation’, and ‘generalisability’.

Search terms were customised for each database including the use of MESH terms when applicable. We refrained from adding methodological criteria (e.g. randomisation procedures for group allocation) to get a broad overview of the existing literature. The search was performed by the first author on the databases Cinahl, Cochrane, Embase, PubMed, Pedro, PsycINFO, Scopus and Web of Knowledge (an example of a detailed search strategy is shown in [S1 Table](#)). The reference lists of original research papers and systematic reviews were screened for further eligible studies. The primary search was performed in March 2015 (for the period 1960 to March 2015) and updated in December 2016 (period 2015 to 2016).

We excluded studies that allowed a true practice phase (i.e., not a typical familiarization phase which normally consists of a few trials that are performed to have the participant give an idea about the skill to be learned) before the actual acquisition phase. There is a phenomenon called “learning to learn” [17] which describes the beneficial influence of prior practice experience on an unfamiliar motor task [18]. In humans, this phenomenon has been observed in visuomotor [18,19], and cognitive tasks [20–22]. In a recent study with healthy young adults practicing a dynamic balance task, the “learning to learn” phenomenon could not be reproduced [23]. We included studies with a wide variety of motor tasks. Since there is no general accord about the “learning to learn” phenomenon we decided to exclude studies with prior practice phase because this would affect the comparability with studies without such a practice phase.

We also excluded conference papers, studies of which only the abstracts were available, unpublished dissertations, and studies in a language other than English or German.

## Selection procedure

Firstly, JG and HVH read the titles and abstracts and decided upon eligibility independently. Secondly, the same authors read the full texts of the papers that were considered eligible and decided on final eligibility independently. In cases of disagreement, the authors discussed until consensus was reached.

## Data extraction and analysis

JG summarised relevant data using a standardised data extraction sheet. Included were the type of study, participants (population, age, number per group), task, information regarding the acquisition, retention and transfer phases, including time points, duration, used outcome measures (e.g. anticipation timing task) and parameters (e.g. variable and random error), as

well as the results. In case of incomplete reporting of patient characteristics or study procedure, we contacted the authors of the original publication.

We had planned to pool data when studies were comparable regarding populations, interventions, outcomes, and types of studies. If we were not able to follow this approach, due to heterogeneity of the studies, pooling within relevant subgroups was considered. When we would choose to refrain from pooling completely, because meaningful subgroups could not be built a best evidence synthesis would be performed using the levels of evidence described by Tulder et al. [24]. The results of each study would be rated as significant (favouring blocked or random order), inconsistent or not significant. Consistency of the results within one study would be given if 75% of the comparisons (e.g. measures, parameters, tasks) would provide similar results (e.g. random was better than blocked for the retention). Then the evidence of the different tasks (several studies per task, if possible) was rated according to the suggestions by Tulder et al. [24]: strong (consistent findings among multiple high quality randomised controlled trials (RCTs)), moderate (consistent findings among multiple low quality RCTs and/or controlled clinical trials (CCTs) and/or high one high quality RCT), limited (one low quality RCT and/or CCT, conflicting (inconsistent findings among multiple RCTs and/or CCTs; inconsistent findings among different parameters within one trial (if only one trial is available) or no evidence from trials (no RCTs or CCTs). Consistency of the studies assessing similar tasks would be given if more than 75% of the studies showed results in the same direction.

### Methodological quality assessment

JG and CB assessed the level of evidence and the methodological quality of the eligible studies independently from each other, as recommended by the AACPDm [15]. The detailed descriptions of the evidence levels are displayed in [S2 Table](#). The evaluation of the methodological quality included the seven aspects also described by the AACPDm [15] (for details see [S3 Table](#)).

We also evaluated the risk of bias. Bias is defined as any systematic error that results in an incorrect estimate of the true effect of an exposure on the outcome of interest. Bias can result in an over- or underestimation of the true value depending on the type of bias. We considered selection bias (i.e. sequence generation, allocation concealment), performance bias (i.e. blinding participants, personnel), attrition bias (i.e. incomplete outcome data), reporting bias (i.e. selective reporting), and other sources of bias (see also [S4 Table](#)). As bias is a potential threat to the trustworthiness of study results, the strength of a conclusion of a systematic review should be adjusted accordingly [16].

JG and CB rated the risk of bias according to recommendations described in the Cochrane Handbook for Systematic reviews of Interventions [16]. Discrepancies between the two authors were discussed until consensus was reached.

## Results

### Search results

The primary search in the databases led to 503 records ([Fig 1](#)). The 11 full texts that were excluded due to topic reasons were not motor learning studies or did not evaluate contextual interference. Thirteen full texts were excluded due to design issues (5 had no random order practice group, 4 had several practice orders within the same group (i.e., no parallel study design), 2 had a preparation phase, in which participants were allowed to practice for several sessions prior to the acquisition phase, 1 study had no blocked practice but a series of trials in blocks, and 1 had no blocked group but two random groups with different levels of variation). By checking the references of eight reviews (four were found during the primary search, three

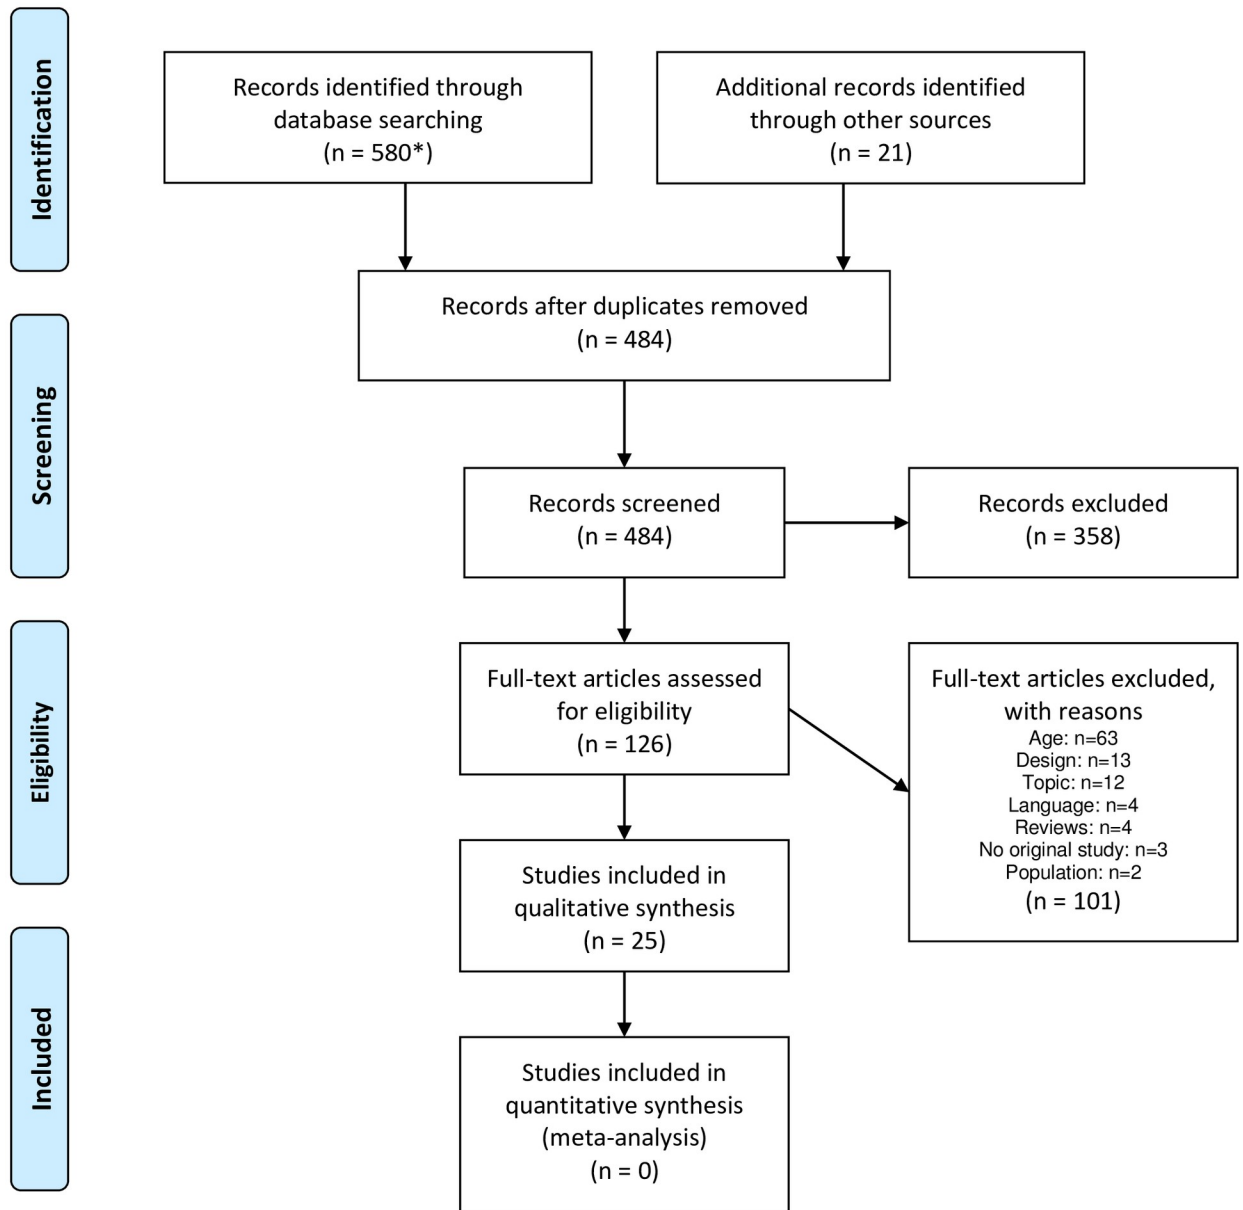

\*includes records from primary search (for publications within time period 01.01.1960-31.03.2015) and search update (for publications within time period 2015-2016). There might be duplicates due to the overlap of the time periods (January to March 2015) which were removed during the second step.

**Fig 1. Flowchart of the search process.** Flowchart of the primary search (time period between 01.01.1960 and 31.03.2015) the updated search (time period of 2015 and 2016), and the inclusion and exclusion process. From: Moher D, Liberati A, Tetzlaff J, Altman DG, The PRISMA Group (2009). Preferred Reporting Items for Systematic Reviews and Meta-Analyses: The PRISMA Statement. *PLoS Med* 6(7): e1000097. doi:10.1371/journal.pmed1000097. For more information, visit [www.prisma-statement.org](http://www.prisma-statement.org).

<https://doi.org/10.1371/journal.pone.0209979.g001>

within the references of these reviews and one by coincidence on google scholar) that focussed on contextual interference in general (not specifically for children), we could include two additional studies. The references of the original research studies contained no further eligible studies. The updated search resulted in one additional study (Fig 1).

We included 25 papers in this systematic review. One paper presented three different experiments with three different samples [25]. This paper is handled as three separate studies in our review. Four of 27 studies assessed typically developing children as well as participants with disorders: Down's Syndrome [6], learning disabilities [26], mild mental handicaps [27], and CP [28]. Only the groups of typically developing children (i.e. with no diagnoses or disorders) were included for the best evidence synthesis. Concerning patient groups with congenital or acquired brain lesions, we included only the study in which children with CP learned to grasp unfamiliar objects [28]. Information of each study is presented in [Table 1](#).

## The methodological quality of the studies

**Evidence levels (Table 2).** Most studies have an evidence level II or III, except for one, which had a level I [34]. Eight studies did not perform a randomisation [7,14,31–33,35,37,45], and were rated as level III. Two studies used cluster randomisation of school classes [30,44]. One study randomly divided the participants into a complex and a simple task group and then further subdivided these groups into subgroups [14], but as this latter subdivision was not described, we did not consider it randomisation.

**Quality of conduct (Table 2).** The methodological quality of the studies was low. Twenty-two studies received 0 out of 7 points. No study received a point for the questions 1 (allocation, randomisation), 2 (description and adherence of interventions), 5 (statistics), and 7 (appropriate methods the control confounding and bias). Two studies received 1 point (study by Jones & French [38], experiment 1 from Ste-Marie et al. [25]) and three studies received 2 points (study by Broadbent et al. [31], experiments 2 and 3 from Ste-Marie et al. [25]).

**Risk of bias.** Most of the studies had a high risk of bias in all domains, except for Broadbent et al. [31] who defined the primary outcome measure and presented the results for all time points [31]. Therefore, we rated the risk of attrition bias as low.

Combining the study results by pooling the data in a meta-analysis was not appropriate since the studies were too heterogeneous considering the populations, types of motor tasks, intensities, time points (e.g. retention after five minutes, 24 hours or three weeks), and outcome measures. We also refrained from a subgroup analysis due to the low methodological quality and too small sample sizes of studies with sufficient relevant similarities.

## Best evidence synthesis

The best evidence synthesis ([Table 3](#)) was conducted for the typically developing children. We grouped the studies according to the tasks they evaluated and received 15 task-specific groups. For most tasks, the evidence was conflicting or absent. Single tasks showed limited to moderate evidence supporting the contextual interference effect. Acquisition: there was limited evidence for the benefit of blocked practice over random practice for dance step sequence [29], ball rolling, striking, and kicking [44], and a positioning motor task [40]. Retention: There was limited evidence for the benefit of random practice over blocked practice for throwing different balls [35] and playing tennis in a simulated environment [31]. Transfer: Moderately consistent evidence was found for the benefit of random practice over blocked practice for handwriting skills [25] and limited evidence for throwing different balls [35].

## Discussion

We investigated the evidence of contextual interference in children with congenital or acquired brain injuries and typically developing children. Only one study included children with brain lesions. The methodological quality of the studies was low and the risk of bias high,



Table 1. Summary of the included studies.

| Study                       | Description                                                                                                                                                                                                                          |                                                                                                | Acquisition                                                                                           |                                                                          | Retention                                                                                              |                                                   | Transfer                                                                                                                                                                                                                            |                                                                                                                                                                                                                                                                                                                            | Results  |  |
|-----------------------------|--------------------------------------------------------------------------------------------------------------------------------------------------------------------------------------------------------------------------------------|------------------------------------------------------------------------------------------------|-------------------------------------------------------------------------------------------------------|--------------------------------------------------------------------------|--------------------------------------------------------------------------------------------------------|---------------------------------------------------|-------------------------------------------------------------------------------------------------------------------------------------------------------------------------------------------------------------------------------------|----------------------------------------------------------------------------------------------------------------------------------------------------------------------------------------------------------------------------------------------------------------------------------------------------------------------------|----------|--|
|                             | Participants<br><i>n</i> total<br><i>n</i> group                                                                                                                                                                                     | Task/skill                                                                                     | Timeframe<br>Outcome measure<br>Outcome parameter                                                     | Timeframe<br>Outcome measure<br>Outcome parameter                        | Timeframe<br>Outcome measure<br>Outcome parameter                                                      | Timeframe<br>Outcome measure<br>Outcome parameter | Timeframe<br>Outcome measure<br>Outcome parameter                                                                                                                                                                                   | Retention                                                                                                                                                                                                                                                                                                                  | Transfer |  |
| Bertollo et al., 2010 [29]  | Female high school students (mean age = 15.8 yrs., SD = 1.3 yrs.)<br>Total: 40<br>Blocked: 20<br>Random: 20                                                                                                                          | Dance step sequence (different sequences)                                                      | 3 weeks<br>2 sessions / week (30 min each)<br>Step sequence<br>Score of spatial and temporal accuracy | After 21 days<br>Step sequence<br>Score of spatial and temporal accuracy | NA<br>NA<br>NA                                                                                         | NA                                                | No significant group difference                                                                                                                                                                                                     | NA                                                                                                                                                                                                                                                                                                                         |          |  |
| Bortoli et al., 1992 [30]   | 9th grade students (mean age = 14.6 yrs., SD = 0.7 yrs.)<br>Total: 52                                                                                                                                                                | Volleyball skills (bump, volley, surf)                                                         | 6 weeks<br>1 session / week<br>Specified targets<br>Scores of accuracy                                | After 1 week<br>Specified targets<br>Scores of accuracy                  | After 1 week<br>Targets 1 meter (short transfer), 1 meter behind (long transfer)<br>Scores of accuracy | After 1 week                                      | No significant group difference                                                                                                                                                                                                     | Long transfer:<br>random > blocked ( $F_{3,48} = 2.97$ , $p < 0.05$ , all 4 groups)<br>Short transfer:<br>not reported                                                                                                                                                                                                     |          |  |
| Broadbent et al., 2015 [31] | Blocked: 13<br>Random: 13<br>Serial Organisation: 13<br>Serial organisation (very high CI): 13                                                                                                                                       | Reaction to simulation: tennis skills (forehand groundstroke, forehand smash, forehand volley) | 3 weeks<br>1 session / week (15 min each)<br>Tasks themselves<br>Response = primary outcome           | After 7 days<br>Tasks themselves<br>Response = primary outcome           | After 7 days<br>Tasks themselves<br>Response = primary outcome                                         | After 7 days                                      | No main effect for group ( $F_{1,16} = 2.9$ , $p = 0.11$ )<br>Significant group x test interaction ( $F_{1,16} = 6.03$ , $p = 0.03$ )<br>random<br>(mean $\pm$ SD = 71.7 $\pm$ 5.3%) > blocked<br>(mean $\pm$ SD = 63.3 $\pm$ 6.0%) | Response accuracy:<br>no significant group effect ( $F_{1,14} = 0.03$ , $p = 0.86$ )<br>Decision time:<br>significant difference ( $F_{1,14} = 7.19$ , $p = 0.02$ )<br>random (mean $\pm$ SD = 98 $\pm$ 89 ms) > blocked<br>(mean $\pm$ SD = 238 $\pm$ 118 ms)                                                             |          |  |
| Del Rey et al., 1983 [32]   | Children, half of the sample experienced in sports requiring coincident anticipation (median age = 8.33 yrs., range = 6.50 yrs. to 10.67 yrs.)<br>Total: 80<br>Blocked: 40<br>Random: 40<br>20 girls and boys in each practice group | Anticipation timing task                                                                       | 1 session<br>60 trials<br>Task itself<br>Absolute error<br>Variable error                             | NA<br>NA<br>NA                                                           | Immediately after<br>Task itself, new speed<br>Absolute error<br>Variable error                        | NA                                                | Significant group difference blocked > random (probably for both, absolute and variable error, since analyses for the two errors, for the most part, agreed, p. 582)                                                                | Absolute error:<br>no significant group difference ( $p = 0.05$ ) (blocked:<br>mean $\pm$ SD = 70 $\pm$ 45 ms;<br>random: mean $\pm$ SD = 106 $\pm$ 62 ms)<br>Variable error:<br>no significant group difference ( $p = 0.05$ ) (blocked:<br>mean $\pm$ SD = 74 $\pm$ 25 ms;<br>random:<br>mean $\pm$ SD = 98 $\pm$ 42 ms) |          |  |

(Continued)

Table 1. (Continued)

| Study                    | Description                                                                                                                                                      |                                               | Task/skill                                                                      | Acquisition                                                                     |                                                                                 | Retention         |                                                                                                                                                                                                                                                                                                                                                                                                                                                                                  | Transfer                                                                                                                                |                                                                                                                                                                                                                                                                                                                       | Results                                                                                 |                                                                                                                                                                                                                                                                                                                                                   |          |
|--------------------------|------------------------------------------------------------------------------------------------------------------------------------------------------------------|-----------------------------------------------|---------------------------------------------------------------------------------|---------------------------------------------------------------------------------|---------------------------------------------------------------------------------|-------------------|----------------------------------------------------------------------------------------------------------------------------------------------------------------------------------------------------------------------------------------------------------------------------------------------------------------------------------------------------------------------------------------------------------------------------------------------------------------------------------|-----------------------------------------------------------------------------------------------------------------------------------------|-----------------------------------------------------------------------------------------------------------------------------------------------------------------------------------------------------------------------------------------------------------------------------------------------------------------------|-----------------------------------------------------------------------------------------|---------------------------------------------------------------------------------------------------------------------------------------------------------------------------------------------------------------------------------------------------------------------------------------------------------------------------------------------------|----------|
|                          | Participants<br><i>n</i> total                                                                                                                                   | <i>n</i> group                                |                                                                                 | Timeframe                                                                       | Outcome measure                                                                 | Timeframe         | Outcome measure                                                                                                                                                                                                                                                                                                                                                                                                                                                                  | Timeframe                                                                                                                               | Outcome measure                                                                                                                                                                                                                                                                                                       | Acquisition                                                                             | Retention                                                                                                                                                                                                                                                                                                                                         | Transfer |
|                          |                                                                                                                                                                  |                                               |                                                                                 | Outcome parameter                                                               | Outcome parameter                                                               | Outcome parameter | Outcome parameter                                                                                                                                                                                                                                                                                                                                                                                                                                                                |                                                                                                                                         |                                                                                                                                                                                                                                                                                                                       |                                                                                         |                                                                                                                                                                                                                                                                                                                                                   |          |
| Duff et al., 2003 [28]   | Children with hemiplegic CP (mean age = 10 yrs., SD = 1.8 yrs.)<br>TD children (mean age = 10.4 yrs., SD = 1.7 yrs.)<br>Total: 36                                | Lifting unfamiliar objects                    | 1 session<br>81 trials                                                          | Tasks themselves                                                                | immediate: after 5 min<br>delayed: after 24 hours                               | tasks themselves  | NA                                                                                                                                                                                                                                                                                                                                                                                                                                                                               | NA                                                                                                                                      | All participants: no significant CP difference<br>CP: not reported<br>TID: not reported                                                                                                                                                                                                                               | All participants: no significant CP difference<br>CP: not reported<br>TID: not reported | NA                                                                                                                                                                                                                                                                                                                                                |          |
|                          |                                                                                                                                                                  |                                               | Load force rate<br>Acceleration after lift-off<br>Grip force<br>Grip force rate | Load force rate<br>Acceleration after lift-off<br>Grip force<br>Grip force rate | Load force rate<br>Acceleration after lift-off<br>Grip force<br>Grip force rate | NA<br>NA          | object differentiation in the 9th block: blocked > random (p < 0.05)<br>other blocks: not reported<br>Load force rate: object differentiation in the 9th block: blocked > random (p < 0.001)<br>other blocks: no significant group difference<br>Acceleration after lift-off: object differentiation in the 1st block: blocked > random (p < 0.01)<br>Acceleration between objects more similar for blocked vs. random group (p > 0.05)<br>CP: not reported<br>TID: not reported |                                                                                                                                         |                                                                                                                                                                                                                                                                                                                       |                                                                                         |                                                                                                                                                                                                                                                                                                                                                   |          |
| Edwards et al., 1986 [6] | Children with DS (mean CA = 18.1 yrs., SD = 2.5 yrs.; mean MA = 4.7 yrs., SD = 1.4 yrs.)<br>Children without DS (mean CA = 5.8 yrs., SD = 2.0 yrs.)<br>Total: 40 | Coincident anticipation timing task           | 1 session<br>4 x 16 trials                                                      | Tasks themselves                                                                | NA                                                                              | NA                | After 10 minutes                                                                                                                                                                                                                                                                                                                                                                                                                                                                 | Both groups (DS and no DS): Absolute constant error: no significant group difference<br>Variable error: no significant group difference | Both groups (DS and no DS): Absolute constant error: no significant group difference<br>Variable error: no significant group difference                                                                                                                                                                               | NA                                                                                      | Inside transfer:<br>Absolute constant error: no significant difference<br>Variable error: significant group x training x block interaction (F <sub>3,36</sub> = 4.1)<br>random > blocked (no DS)<br>Outside transfer (both groups (DS and no DS): Absolute constant error: no significant difference<br>Variable error: no significant difference |          |
|                          |                                                                                                                                                                  |                                               | Load force rate<br>Acceleration after lift-off<br>Grip force<br>Grip force rate | Load force rate<br>Acceleration after lift-off<br>Grip force<br>Grip force rate | Load force rate<br>Acceleration after lift-off<br>Grip force<br>Grip force rate | NA<br>NA          | Same task, different speeds (within transfer: speed within the trained speed range; outside transfer: speed outside the trained speed range)                                                                                                                                                                                                                                                                                                                                     |                                                                                                                                         |                                                                                                                                                                                                                                                                                                                       |                                                                                         |                                                                                                                                                                                                                                                                                                                                                   |          |
| Fialho et al., 2006 [33] | Skilled volleyball players (mean age = 16.3 yrs., SD = 0.67 yrs.)<br>Total: 10                                                                                   | Volleyball skills (tennis serve, float serve) | 4 days<br>1 session / day (46 trials each)                                      | Absolute constant error<br>Variable error                                       | NA                                                                              | NA                | After 10 minutes<br>After 24 hours (retention of the transfer)                                                                                                                                                                                                                                                                                                                                                                                                                   | Mean score:<br>NA (between group results not reported)<br>SD of the score:<br>no significant group difference                           | Mean score:<br>Transfer: NA (between group results not reported)<br>Retention of the transfer:<br>random > blocked H <sub>10,1</sub> = 3.6,<br>P < 0.05) for the first block of trials<br>SD of the score:<br>Transfer: no significant group difference<br>Retention of the transfer: no significant group difference | NA                                                                                      | Mean score:<br>Transfer: NA (between group results not reported)<br>Retention of the transfer:<br>random > blocked H <sub>10,1</sub> = 3.6,<br>P < 0.05) for the first block of trials<br>SD of the score:<br>Transfer: no significant group difference<br>Retention of the transfer: no significant group difference                             |          |
|                          |                                                                                                                                                                  |                                               | Tasks themselves                                                                | Accuracy scores of the serves (means and SDs)                                   | Accuracy scores of the serves (means and SDs)                                   | NA                | Asian serve (retention of the transfer)                                                                                                                                                                                                                                                                                                                                                                                                                                          |                                                                                                                                         |                                                                                                                                                                                                                                                                                                                       |                                                                                         |                                                                                                                                                                                                                                                                                                                                                   |          |
|                          | Blocked: 5<br>Random: 5                                                                                                                                          |                                               |                                                                                 |                                                                                 |                                                                                 |                   |                                                                                                                                                                                                                                                                                                                                                                                                                                                                                  |                                                                                                                                         |                                                                                                                                                                                                                                                                                                                       |                                                                                         | (Continued)                                                                                                                                                                                                                                                                                                                                       |          |



Table 1. (Continued)

| Study                             | Description                                                                                                                                                                                                                                       |                                                       | Acquisition                 |                                                             | Retention                   |                                                             | Transfer                                      |                                                             | Results                                                                                                                                                                                                                                                                                                                                                                                                                                                                                                                                                                                                                                                                                                                              |                                                                                                                                         |                                                                                                                                         |
|-----------------------------------|---------------------------------------------------------------------------------------------------------------------------------------------------------------------------------------------------------------------------------------------------|-------------------------------------------------------|-----------------------------|-------------------------------------------------------------|-----------------------------|-------------------------------------------------------------|-----------------------------------------------|-------------------------------------------------------------|--------------------------------------------------------------------------------------------------------------------------------------------------------------------------------------------------------------------------------------------------------------------------------------------------------------------------------------------------------------------------------------------------------------------------------------------------------------------------------------------------------------------------------------------------------------------------------------------------------------------------------------------------------------------------------------------------------------------------------------|-----------------------------------------------------------------------------------------------------------------------------------------|-----------------------------------------------------------------------------------------------------------------------------------------|
|                                   | Participants                                                                                                                                                                                                                                      | Task/skill                                            | Timeframe                   | Outcome measure                                             | Timeframe                   | Outcome measure                                             | Timeframe                                     | Outcome measure                                             | Acquisition                                                                                                                                                                                                                                                                                                                                                                                                                                                                                                                                                                                                                                                                                                                          | Retention                                                                                                                               | Transfer                                                                                                                                |
|                                   | n total<br>n group                                                                                                                                                                                                                                |                                                       | Outcome parameter           | Outcome parameter                                           | Outcome parameter           | Outcome parameter                                           | Outcome parameter                             | Outcome parameter                                           |                                                                                                                                                                                                                                                                                                                                                                                                                                                                                                                                                                                                                                                                                                                                      |                                                                                                                                         |                                                                                                                                         |
| French et al., 1990 [34]          | 9th grade students, enrolled in physical education (mean age/SD = NA)<br>Total: 139<br>Blocked: NA<br>Random: NA<br>Random-blocked: NA                                                                                                            | Volleyball skills (forearm pass, overhead set, serve) | 6 days                      | 1 session / day (30 trials each)                            | After 2 days                | Tasks themselves                                            | NA                                            | NA                                                          | No significant main or interaction effect                                                                                                                                                                                                                                                                                                                                                                                                                                                                                                                                                                                                                                                                                            | No significant main effect                                                                                                              | NA                                                                                                                                      |
|                                   |                                                                                                                                                                                                                                                   |                                                       | Tasks themselves            | Scores for accuracy and force                               | Tasks themselves            | Scores for accuracy and force                               | NA                                            | NA                                                          |                                                                                                                                                                                                                                                                                                                                                                                                                                                                                                                                                                                                                                                                                                                                      |                                                                                                                                         |                                                                                                                                         |
|                                   |                                                                                                                                                                                                                                                   |                                                       | Tasks themselves            | Scores for accuracy and force                               | Tasks themselves            | Scores for accuracy and force                               | NA                                            | NA                                                          |                                                                                                                                                                                                                                                                                                                                                                                                                                                                                                                                                                                                                                                                                                                                      |                                                                                                                                         |                                                                                                                                         |
| Gophta et al., 2007 [26]          | Children with LD (mean age = 7.1 yrs., SD = 0.25 yrs.)<br>Children without LD (mean age = 7.9 yrs., SD = 0.31 yrs.)<br>Total: 48<br>Children with LD: 24<br>Blocked: 12*<br>Random: 12*<br>Children without LD: 24<br>Blocked: 12*<br>Random: 12* | Mirror tracing task (different shapes)                | 1 session                   | 36 trials                                                   | After 1 week                | Tasks themselves (3 shapes)                                 | After 1 week                                  | After 1 week                                                | n errors: random > blocked (all participants, p = 0.02)<br>Error time: no significant group difference<br>Total time: no significant group difference                                                                                                                                                                                                                                                                                                                                                                                                                                                                                                                                                                                | n errors: no significant group difference<br>Error time: no significant group difference<br>Total time: no significant group difference | n errors: no significant group difference<br>Error time: no significant group difference<br>Total time: no significant group difference |
|                                   |                                                                                                                                                                                                                                                   |                                                       | Tasks themselves (3 shapes) | n errors<br>Error time<br>Total time (to complete the task) | Tasks themselves (3 shapes) | n errors<br>Error time<br>Total time (to complete the task) | Same task, 2 different shapes                 | n errors<br>Error time<br>Total time (to complete the task) |                                                                                                                                                                                                                                                                                                                                                                                                                                                                                                                                                                                                                                                                                                                                      |                                                                                                                                         |                                                                                                                                         |
|                                   |                                                                                                                                                                                                                                                   |                                                       | Tasks themselves (3 shapes) | n errors<br>Error time<br>Total time (to complete the task) | Tasks themselves (3 shapes) | n errors<br>Error time<br>Total time (to complete the task) | Same task, different ball, different distance | n errors<br>Error time<br>Total time (to complete the task) |                                                                                                                                                                                                                                                                                                                                                                                                                                                                                                                                                                                                                                                                                                                                      |                                                                                                                                         |                                                                                                                                         |
| Granda Vera & Montilla, 2003 [35] | 6-yr.-old children (considered normal and healthy)<br>Total: 71<br>Blocked: 34<br>Random: 37                                                                                                                                                      | Throwing different balls                              | 6 weeks                     | 3 sessions / week (50 minutes each)                         | After 2 weeks               | Tasks themselves                                            | After 2 weeks                                 | After 2 weeks                                               | Vertical target:<br>Tennis ball (3 m): random > blocked (F = 7.54, p = 0.008)<br>Feather fly ball (3 m): random > blocked (F = 5.90, p = 0.02)<br>Tennis ball (5 m): no significant group difference<br>Feather fly ball (5 m): no significant group difference<br>Horizontal target:<br>Tennis ball (3 m): no significant group difference<br>Feather fly ball (3 m): no significant group difference<br>Tennis ball (5 m): no significant group difference<br>Feather fly ball (5 m): no significant group difference<br>Total score vertical target: random > blocked (F = 5.68, p = 0.02)<br>Total score horizontal target: no significant group difference<br>Total score all conditions: random > blocked (F = 3.68, p = 0.05) | Random<br>(mean ± SD = 13.0 ± 4.47) > blocked<br>(mean ± SD = 9.29 ± 3.62) (F = 16.26, p = 0.001)                                       | Random<br>(mean ± SD = 10.08 ± 54.01) > blocked<br>(mean ± SD = 7.58 ± 2.72) (F = 11.79, p = 0.001)                                     |
|                                   |                                                                                                                                                                                                                                                   |                                                       | Tasks themselves            | Performance score                                           | Tasks themselves            | Performance score                                           | Same task, different ball, different distance | Performance score                                           |                                                                                                                                                                                                                                                                                                                                                                                                                                                                                                                                                                                                                                                                                                                                      |                                                                                                                                         |                                                                                                                                         |
|                                   |                                                                                                                                                                                                                                                   |                                                       | Performance score           | Performance score                                           | Performance score           | Performance score                                           | Performance score                             | Performance score                                           |                                                                                                                                                                                                                                                                                                                                                                                                                                                                                                                                                                                                                                                                                                                                      |                                                                                                                                         |                                                                                                                                         |

(Continued)

Table 1. (Continued)

| Study                       | Description                                                                                          |            | Task/skill                                                                                                                                                                             | Acquisition                                                      |                                                                  | Retention                                                        |                                                                  | Transfer                                                                                                |                                                                                                                                                                                                                                                                                                                     | Results                                                                                                                                                                                                                                                                                                 |                                                                                                                                                                                                                                                 |
|-----------------------------|------------------------------------------------------------------------------------------------------|------------|----------------------------------------------------------------------------------------------------------------------------------------------------------------------------------------|------------------------------------------------------------------|------------------------------------------------------------------|------------------------------------------------------------------|------------------------------------------------------------------|---------------------------------------------------------------------------------------------------------|---------------------------------------------------------------------------------------------------------------------------------------------------------------------------------------------------------------------------------------------------------------------------------------------------------------------|---------------------------------------------------------------------------------------------------------------------------------------------------------------------------------------------------------------------------------------------------------------------------------------------------------|-------------------------------------------------------------------------------------------------------------------------------------------------------------------------------------------------------------------------------------------------|
|                             | Participants                                                                                         | n total    |                                                                                                                                                                                        | Timeframe                                                        | Outcome measure                                                  | Timeframe                                                        | Outcome measure                                                  | Timeframe                                                                                               | Outcome measure                                                                                                                                                                                                                                                                                                     | Acquisition                                                                                                                                                                                                                                                                                             | Retention                                                                                                                                                                                                                                       |
| Green et al., 1995 [36]     | Female students (first year secondary school eastern England), right handed novices in racket sports | Total: 48  | Hitting different balls with different rackets (tennis, squash, badminton, short tennis)                                                                                               | 4 days (48 trials each)                                          | After 1 minute, after 1, 4 and 8 days                            | After 1 minute, after 1, 4 and 8 days                            | After 1 minute, after 1, 4 and 8 days                            | After 1 minute, after 1, 4 and 8 days                                                                   | No significant group difference                                                                                                                                                                                                                                                                                     | NA                                                                                                                                                                                                                                                                                                      | Both dimensions out of range: (racket and target): random > blocked (F = 6.84, p < 0.05)<br>One dimension out of range: (racket or target): blocked > random (F = 10.07, p < 0.01)                                                              |
|                             |                                                                                                      |            |                                                                                                                                                                                        | Tasks themselves                                                 | Tasks themselves                                                 | Tasks themselves                                                 | Tasks themselves                                                 | Same task, different racket and / or different target                                                   | Error scores (target accuracy)                                                                                                                                                                                                                                                                                      | Same task, different racket and / or different target                                                                                                                                                                                                                                                   | Same task, different racket and / or different target                                                                                                                                                                                           |
| Jarus & Goreover, 1999 [37] | Healthy children, no motor or cognitive deficits (mean age = 8.15 yrs., SD = 2.44 yrs.)              | Total: 120 | Throwing beanbags of different sizes to targets of different distances                                                                                                                 | 1 session 30 trials                                              | After 30 minutes                                                 | After 30 minutes                                                 | After 30 minutes                                                 | After 30 minutes                                                                                        | All participants: blocked (mean ± SD = 19.75 ± 10.29 cm) (mean ± SD = 26.30 ± 12.20 cm) F <sub>1,81</sub> = 5.29, p < 0.01<br>5-yr.-old: no significant group difference<br>7-yr.-old: blocked (mean ± SD = 22.11 ± 8.65 cm) > random<br>11-yr.-old: (mean ± SD = 33.11 ± 11.17 cm) no significant group difference | All participants: blocked (mean ± SD = 19.75 ± 10.29 cm) (mean ± SD = 25.30 ± 11.37 cm) F <sub>3,108</sub> = 3.73, p < 0.05<br>5-yr.-old: no significant group difference<br>7-yr.-old: blocked (mean ± SD = 17.17 ± 8.05 cm) (mean ± SD = 28.25 ± 8.34 cm) 11-yr.-old: no significant group difference | No significant group difference for neither all participants nor any of the age groups                                                                                                                                                          |
|                             |                                                                                                      |            |                                                                                                                                                                                        | Tasks themselves                                                 | Tasks themselves                                                 | Tasks themselves                                                 | Tasks themselves                                                 | Same task, different targets                                                                            | Distance from target                                                                                                                                                                                                                                                                                                | Same task, different targets                                                                                                                                                                                                                                                                            | Distance from target                                                                                                                                                                                                                            |
| Jarus & Gutman, 2001 [14]   | Children from public school, no cognitive and motor deficits (mean age = 8.52 yrs., SD = 0.61 yrs.)  | Total: 96  | Throwing beanbags of different sizes to targets of different distances<br>Simple task: different bag weights<br>Complex task: different bag weights, and sizes, different target order | 1 session 30 trials                                              | After one day                                                    | After one day                                                    | After one day                                                    | After one day                                                                                           | Simple task: no significant group difference<br>Accuracy score: not reported due to lack of significant results<br>Complex task: Total time: blocked (mean ± SD = 10.83 ± 3.1) > random<br>(mean ± SD = 14.94 ± 4.34)<br>Accuracy score: not reported due to lack of significant results                            | Simple task: no significant group difference<br>Accuracy score: not reported due to lack of significant results<br>Complex task: Total time: no significant group difference<br>Accuracy score: not reported due to lack of significant results                                                         | Simple task: no significant group difference<br>Accuracy score: not reported due to lack of significant results<br>Complex task: Total time: no significant group difference<br>Accuracy score: not reported due to lack of significant results |
|                             |                                                                                                      |            |                                                                                                                                                                                        | Tasks themselves                                                 | Tasks themselves                                                 | Tasks themselves                                                 | Tasks themselves                                                 | Same task, different bag (simple transfer), different bag and different target order (complex transfer) | Distance from target                                                                                                                                                                                                                                                                                                | Same task, different bag (simple transfer), different bag and different target order (complex transfer)                                                                                                                                                                                                 | Same task, different bag (simple transfer), different bag and different target order (complex transfer)                                                                                                                                         |
|                             |                                                                                                      |            |                                                                                                                                                                                        | Total time to complete each trial                                | Total time to complete each trial                                | Total time to complete each trial                                | Total time to complete each trial                                | Total time to complete each trial                                                                       | Total time to complete each trial                                                                                                                                                                                                                                                                                   | Total time to complete each trial                                                                                                                                                                                                                                                                       | Total time to complete each trial                                                                                                                                                                                                               |
|                             |                                                                                                      |            |                                                                                                                                                                                        | Accuracy score (not reported due to lack of significant results) | Accuracy score (not reported due to lack of significant results) | Accuracy score (not reported due to lack of significant results) | Accuracy score (not reported due to lack of significant results) | Accuracy score (not reported due to lack of significant results)                                        | Accuracy score (not reported due to lack of significant results)                                                                                                                                                                                                                                                    | Accuracy score (not reported due to lack of significant results)                                                                                                                                                                                                                                        | Accuracy score (not reported due to lack of significant results)                                                                                                                                                                                |
|                             |                                                                                                      |            |                                                                                                                                                                                        | of significant results)                                          | of significant results)                                          | of significant results)                                          | of significant results)                                          | of significant results)                                                                                 | of significant results)                                                                                                                                                                                                                                                                                             | of significant results)                                                                                                                                                                                                                                                                                 | of significant results)                                                                                                                                                                                                                         |

(Continued)

Table 1. (Continued)

| Study                     | Description                                                                                                                                                                                    |                                                                                                                                                                           | Task/skill                                                                            | Acquisition                                |                                               | Retention                                     |                 | Transfer                                                                                                                                  |                                                                                                                                                                                                                                                                                                                                                                              | Results                                                                                                                                                                                                                                                                                                                                       |                                          |                                                                                           |           |          |
|---------------------------|------------------------------------------------------------------------------------------------------------------------------------------------------------------------------------------------|---------------------------------------------------------------------------------------------------------------------------------------------------------------------------|---------------------------------------------------------------------------------------|--------------------------------------------|-----------------------------------------------|-----------------------------------------------|-----------------|-------------------------------------------------------------------------------------------------------------------------------------------|------------------------------------------------------------------------------------------------------------------------------------------------------------------------------------------------------------------------------------------------------------------------------------------------------------------------------------------------------------------------------|-----------------------------------------------------------------------------------------------------------------------------------------------------------------------------------------------------------------------------------------------------------------------------------------------------------------------------------------------|------------------------------------------|-------------------------------------------------------------------------------------------|-----------|----------|
|                           | Participants<br><i>n</i> total                                                                                                                                                                 | <i>n</i> group                                                                                                                                                            |                                                                                       | Timeframe                                  | Outcome measure                               | Timeframe                                     | Outcome measure | Timeframe                                                                                                                                 | Outcome measure                                                                                                                                                                                                                                                                                                                                                              | Timeframe                                                                                                                                                                                                                                                                                                                                     | Outcome measure                          | Acquisition                                                                               | Retention | Transfer |
|                           |                                                                                                                                                                                                |                                                                                                                                                                           |                                                                                       |                                            |                                               |                                               |                 |                                                                                                                                           |                                                                                                                                                                                                                                                                                                                                                                              |                                                                                                                                                                                                                                                                                                                                               |                                          |                                                                                           |           |          |
| Jones & French, 2007 [38] | 9th grade students from 3 high-schools, physical educational classes                                                                                                                           | Total: 68<br>51 completed the whole procedure<br>Blocked: 18*<br>Random: 17*<br>Blocked-random: 16*                                                                       | Volleyball skills (underhand serve, forearm pass, overhead set)                       | 9 days                                     | 30 trials / day (approximately 30 min)        | After 2 days                                  | NA              | NA                                                                                                                                        | NA                                                                                                                                                                                                                                                                                                                                                                           | No significant group difference (p>0.05)                                                                                                                                                                                                                                                                                                      | No significant group difference (p>0.05) | NA                                                                                        | NA        |          |
|                           |                                                                                                                                                                                                |                                                                                                                                                                           |                                                                                       | Tasks themselves                           | Tasks themselves                              | Tasks themselves                              | NA              | NA                                                                                                                                        | NA                                                                                                                                                                                                                                                                                                                                                                           | NA                                                                                                                                                                                                                                                                                                                                            |                                          |                                                                                           |           |          |
|                           |                                                                                                                                                                                                |                                                                                                                                                                           |                                                                                       | Scores (accuracy of the volleyball skills) | Scores (accuracy of the volleyball skills)    | Scores (accuracy of the volleyball skills)    | NA              | NA                                                                                                                                        | NA                                                                                                                                                                                                                                                                                                                                                                           | NA                                                                                                                                                                                                                                                                                                                                            |                                          |                                                                                           |           |          |
| Meira & Tani, 2003 [39]   | Female students, secondary school, right-handed, volleyball Novices (mean age = 12.7 yrs., SD = NA)                                                                                            | Total: 36<br>Blocked: 18<br>Random: 18                                                                                                                                    | Volleyball skills (underhand serve, overhand serve, Asian floater)                    | 8 sessions (2 / week)                      | 36 trials / session                           | NA                                            | NA              | Immediately after:<br>Transfer 1<br>3 sessions (2 / week)<br>28 trials / session<br>1 week after:<br>Transfer 2<br>1 session<br>12 trials | Precision scores on target:<br>no significant group difference<br>movement pattern quality scores:<br>No significant group difference                                                                                                                                                                                                                                        | NA                                                                                                                                                                                                                                                                                                                                            | NA                                       | No significant group difference in neither transfer 1 nor 2, in neither of the parameters |           |          |
|                           |                                                                                                                                                                                                |                                                                                                                                                                           |                                                                                       | Tasks themselves, with knowledge of result | Tasks themselves, without knowledge of result | Tasks themselves, without knowledge of result | NA              | NA                                                                                                                                        | NA                                                                                                                                                                                                                                                                                                                                                                           | NA                                                                                                                                                                                                                                                                                                                                            |                                          |                                                                                           |           |          |
|                           |                                                                                                                                                                                                |                                                                                                                                                                           |                                                                                       | Precision scores on target                 | Precision scores on target                    | Precision scores on target                    | NA              | NA                                                                                                                                        | NA                                                                                                                                                                                                                                                                                                                                                                           | NA                                                                                                                                                                                                                                                                                                                                            |                                          |                                                                                           |           |          |
| Painter et al., 1994 [27] | Students enrolled in IDD classrooms at public junior high-school (mean age = 13.9 yrs., SD = NA)<br>Gender- and CA-matched controls from same school district (mean age = 13.11 yrs., SD = NA) | Total: 48<br>Children with IDD: 24<br>Blocked: NA<br>Random: NA<br>Control group: 24<br>Blocked: NA<br>Random: NA<br>Equal number of males/females in each practice group | Throwing beanbags with different throws (underhand throw, overhand throw, hook throw) | 1 session                                  | 45 trials (3 x 15)                            | After 10 minutes                              | NA              | NA                                                                                                                                        | Absolute error:<br>IDD: no significant group difference<br>Controls: no significant group difference<br>Combined: significant trial block x schedule interaction (F <sub>1,4,6,16</sub> = 3.84, p < 0.001), significant error reduction in random group but not in blocked group<br>Variable error:<br>IDD: not reported<br>Controls: not reported<br>Combined: not reported | Absolute error:<br>IDD: blocked > random (p < 0.05 for all comparisons)<br>Controls: no significant group difference<br>Combined: random > blocked (F <sub>1,4,4</sub> = 15.77, p < 0.001)<br>Variable error:<br>IDD: not reported<br>Controls: not reported<br>Combined: consistency random > blocked (F <sub>1,4,4</sub> = 7.94, p < 0.007) | NA                                       | NA                                                                                        |           |          |
|                           |                                                                                                                                                                                                |                                                                                                                                                                           |                                                                                       | Tasks themselves                           | Tasks themselves                              | Tasks themselves                              | NA              | NA                                                                                                                                        | NA                                                                                                                                                                                                                                                                                                                                                                           | NA                                                                                                                                                                                                                                                                                                                                            |                                          |                                                                                           |           |          |
|                           |                                                                                                                                                                                                |                                                                                                                                                                           |                                                                                       | Absolute error<br>Variable error           | Absolute error<br>Variable error              | Absolute error<br>Variable error              | NA              | NA                                                                                                                                        | NA                                                                                                                                                                                                                                                                                                                                                                           | NA                                                                                                                                                                                                                                                                                                                                            |                                          |                                                                                           |           |          |

(Continued)

Table 1. (Continued)

| Study                      | Description                                                                                                               |                                                                                    |                                                                                    | Acquisition                     |                                                              | Retention                                   |                                                                                                                                                                                                                                                                                                                                                                      | Transfer                                                                                                                                                                                                                           |                                                                                                                                                                                              | Results                                                                                                        |           |          |
|----------------------------|---------------------------------------------------------------------------------------------------------------------------|------------------------------------------------------------------------------------|------------------------------------------------------------------------------------|---------------------------------|--------------------------------------------------------------|---------------------------------------------|----------------------------------------------------------------------------------------------------------------------------------------------------------------------------------------------------------------------------------------------------------------------------------------------------------------------------------------------------------------------|------------------------------------------------------------------------------------------------------------------------------------------------------------------------------------------------------------------------------------|----------------------------------------------------------------------------------------------------------------------------------------------------------------------------------------------|----------------------------------------------------------------------------------------------------------------|-----------|----------|
|                            | Participants<br><i>n</i> total<br><i>n</i> group                                                                          | Task/skill                                                                         | Task/skill                                                                         | Timeframe                       | Outcome measure                                              | Timeframe                                   | Outcome measure                                                                                                                                                                                                                                                                                                                                                      | Timeframe                                                                                                                                                                                                                          | Outcome measure                                                                                                                                                                              | Acquisition                                                                                                    | Retention | Transfer |
|                            |                                                                                                                           |                                                                                    |                                                                                    | Outcome parameter               | Outcome parameter                                            | Outcome parameter                           | Outcome parameter                                                                                                                                                                                                                                                                                                                                                    |                                                                                                                                                                                                                                    |                                                                                                                                                                                              |                                                                                                                |           |          |
| Perez et al., 2005 [40]    | Children (mean age = 10.5 yrs., SD = 0.6 yrs.)<br><br>Total: 57                                                           | Positioning motor task                                                             | Positioning motor task                                                             | 1 session<br>60 trials          | NA                                                           | NA                                          | Immediate transfer:<br>10 trials, after 5 minutes<br>Delayed transfer:<br>20 trials, after 24 hours                                                                                                                                                                                                                                                                  | Blocked > random ( $p < 0.01$ ) in all acquisition trials except block 9 (no significant group difference)                                                                                                                         | NA                                                                                                                                                                                           | Immediate transfer: not reported<br>Delayed transfer:<br>random > blocked ( $p < 0.0001$ ) for the first block |           |          |
|                            |                                                                                                                           |                                                                                    |                                                                                    | Task itself                     | NA                                                           | NA                                          | Task itself, different position, no knowledge of result                                                                                                                                                                                                                                                                                                              |                                                                                                                                                                                                                                    |                                                                                                                                                                                              |                                                                                                                |           |          |
|                            |                                                                                                                           |                                                                                    |                                                                                    | Absolute error                  | NA                                                           | NA                                          | Absolute error                                                                                                                                                                                                                                                                                                                                                       |                                                                                                                                                                                                                                    |                                                                                                                                                                                              |                                                                                                                |           |          |
| Pigott & Shapiro, 1984 [7] | Students from the Montessori school in Santa Monica, CA (age range = 6 yrs. 9 months to 8 yrs. 3 months)<br><br>Total: 64 | Throwing bean bags (different weights)                                             | Throwing bean bags (different weights)                                             | 1 session<br>24 trials          | NA                                                           | NA                                          | Immediately after 3 trials                                                                                                                                                                                                                                                                                                                                           | No significant group differences                                                                                                                                                                                                   | NA                                                                                                                                                                                           | No significant group differences                                                                               |           |          |
|                            |                                                                                                                           |                                                                                    |                                                                                    | Task itself                     | NA                                                           | NA                                          | Task itself, different weights                                                                                                                                                                                                                                                                                                                                       |                                                                                                                                                                                                                                    |                                                                                                                                                                                              |                                                                                                                |           |          |
|                            |                                                                                                                           |                                                                                    |                                                                                    | Absolute error                  | NA                                                           | NA                                          | Absolute error                                                                                                                                                                                                                                                                                                                                                       |                                                                                                                                                                                                                                    |                                                                                                                                                                                              |                                                                                                                |           |          |
| Pollock & Lee, 1997 [41]   | Children, 7-yr.-old (mean age = 7.2 yrs., SD = 0.4 yrs.)<br>Adults (mean age = 24.3 yrs., SD = 3.1 yrs.)<br><br>Total: 48 | Propelling a wooden disk with the middle finger (adaptation of the Crokinole game) | Propelling a wooden disk with the middle finger (adaptation of the Crokinole game) | 1 session<br>90 trials (3 x 30) | Immediately after (after transfer test)<br>15 trials (3 x 5) | Immediately after 2 tests, 10 trials each   | All participants:<br>blocked (mean $\pm$ SD = 1.4 $\pm$ 0.8) > random (mean $\pm$ SD = 1.2 $\pm$ 0.8)<br>significant main effect for order ( $F_{1,44} = 5.16, p < 0.05$ )<br>Children:<br>blocked (mean $\pm$ SD = 0.8 $\pm$ 0.6) = random (mean:SD = 0.8 $\pm$ 0.7)<br>Adults:<br>blocked (mean $\pm$ SD = 2.1 $\pm$ 1.0) > random (mean $\pm$ SD = 1.6 $\pm$ 1.0) | All participants:<br>blocked (mean $\pm$ SD = 1.2 $\pm$ 0.7) < random (mean $\pm$ SD = 1.5 $\pm$ 0.9)<br>significant main effect for order ( $F_{1,44} = 4.13, p < 0.05$ )<br>Children:<br>not reported<br>Adults:<br>not reported | All participants:<br>blocked (mean $\pm$ SD = 1.3 $\pm$ 0.8) = random (mean $\pm$ SD = 1.7 $\pm$ 0.9)<br>$F_{1,44} = 3.76, p = 0.06$<br>Children:<br>not reported<br>Adults:<br>not reported |                                                                                                                |           |          |
|                            |                                                                                                                           |                                                                                    |                                                                                    | Task itself                     | Task itself                                                  | Task itself, new starting point, new bumper |                                                                                                                                                                                                                                                                                                                                                                      |                                                                                                                                                                                                                                    |                                                                                                                                                                                              |                                                                                                                |           |          |
|                            |                                                                                                                           |                                                                                    |                                                                                    | Scores (accuracy of the target) | Scores (accuracy of the target)                              | Scores (accuracy of the target)             |                                                                                                                                                                                                                                                                                                                                                                      |                                                                                                                                                                                                                                    |                                                                                                                                                                                              |                                                                                                                |           |          |
| Saemi et al., 2012 [42]    | Male elementary school students, low skilled in throwing tasks (mean age = 10.47 yrs., SD = 0.77 yrs.)<br><br>Total: 36   | Throwing tennis balls from different starting positions to different targets       | Throwing tennis balls from different starting positions to different targets       | 1 session<br>81 trials (3 x 27) | After 1 day (12 trials)                                      | NA                                          | Significant main effect for practice condition ( $F_{2,33} = 4.19, p < 0.024, \eta^2 = 0.203$ ) but no post-hoc pairwise comparison reported<br>No significant practice condition x trial block interaction ( $F_{16,164} = 0.44, p = 0.97$ )                                                                                                                        | No significant group difference                                                                                                                                                                                                    | NA                                                                                                                                                                                           |                                                                                                                |           |          |
|                            |                                                                                                                           |                                                                                    |                                                                                    | Task itself                     | Task itself                                                  | Task itself                                 |                                                                                                                                                                                                                                                                                                                                                                      |                                                                                                                                                                                                                                    |                                                                                                                                                                                              |                                                                                                                |           |          |
|                            |                                                                                                                           |                                                                                    |                                                                                    | Scores (accuracy of the target) | Scores (accuracy of the target)                              | Scores (accuracy of the target)             |                                                                                                                                                                                                                                                                                                                                                                      |                                                                                                                                                                                                                                    |                                                                                                                                                                                              |                                                                                                                |           |          |

(Continued)

Table 1. (Continued)

| Study                                    | Description                                                                                                                                                           |                                                                                   | Task/skill                                              | Acquisition                                                  |                                                              | Retention                                                    |                                                                                                                                                     | Transfer                                                                                                                              |                                                                                                                                                                                           | Results                                                                                                                                                                                   |                                                                                                                                                                                           |                                                                                                                                                                                           |  |
|------------------------------------------|-----------------------------------------------------------------------------------------------------------------------------------------------------------------------|-----------------------------------------------------------------------------------|---------------------------------------------------------|--------------------------------------------------------------|--------------------------------------------------------------|--------------------------------------------------------------|-----------------------------------------------------------------------------------------------------------------------------------------------------|---------------------------------------------------------------------------------------------------------------------------------------|-------------------------------------------------------------------------------------------------------------------------------------------------------------------------------------------|-------------------------------------------------------------------------------------------------------------------------------------------------------------------------------------------|-------------------------------------------------------------------------------------------------------------------------------------------------------------------------------------------|-------------------------------------------------------------------------------------------------------------------------------------------------------------------------------------------|--|
|                                          | Participants                                                                                                                                                          |                                                                                   |                                                         | Timeframe                                                    | Outcome measure                                              | Timeframe                                                    | Outcome measure                                                                                                                                     | Timeframe                                                                                                                             | Outcome measure                                                                                                                                                                           | Acquisition                                                                                                                                                                               | Retention                                                                                                                                                                                 | Transfer                                                                                                                                                                                  |  |
|                                          | n total                                                                                                                                                               | n group                                                                           |                                                         | Outcome parameter                                            | Outcome parameter                                            | Outcome parameter                                            | Outcome parameter                                                                                                                                   | Outcome parameter                                                                                                                     | Outcome parameter                                                                                                                                                                         |                                                                                                                                                                                           |                                                                                                                                                                                           |                                                                                                                                                                                           |  |
| Stambaugh, 2011 [43]                     | Beginning clarinet players (from 16 elementary schools, 5th or 6th grade, in five school districts from the northwest United States (mean age = NA, SD = NA))         | Playing clarinet                                                                  | 3 sessions (18 trials / session)                        | After 24 hours (3 trials)                                    | After 24 hours (3 trials)                                    | After 24 hours (3 trials)                                    | After 24 hours (3 trials)                                                                                                                           | Speed: blocked > random (blocks 1, 2, 3) random > blocked (block 4 and further) (F <sub>5,34</sub> = 5.052, p = 0.001)                | Speed: random > blocked (F <sub>1,38</sub> = 24.953, p < 0.001)                                                                                                                           | Speed: no significant group difference (p = 0.78)                                                                                                                                         | Speed: no significant group difference (p = 0.36)                                                                                                                                         | Speed: no significant group difference (p = 0.88)                                                                                                                                         |  |
|                                          |                                                                                                                                                                       |                                                                                   | Task itself                                             | Task itself                                                  | Task itself                                                  | Task itself, other note sequence                             | Accuracy: no significant group difference (p = 0.28)                                                                                                | Accuracy: no significant group difference (p = 0.44)                                                                                  | Accuracy: no significant group difference (p = 0.36)                                                                                                                                      | Accuracy: no significant group difference (p = 0.06)                                                                                                                                      | Accuracy: no significant group difference (p = 0.88)                                                                                                                                      | Accuracy: no significant group difference (p = 0.88)                                                                                                                                      |  |
|                                          |                                                                                                                                                                       |                                                                                   | Scores (speed, accuracy, temporal evenness)             | Scores (speed, accuracy, temporal evenness)                  | Scores (speed, accuracy, temporal evenness)                  | Scores (speed, accuracy, temporal evenness)                  | Temporal evenness: no significant group difference (p = 0.35)                                                                                       | Temporal evenness: no significant group difference (p = 0.06)                                                                         | Temporal evenness: no significant group difference (p = 0.88)                                                                                                                             | Temporal evenness: no significant group difference (p = 0.88)                                                                                                                             | Temporal evenness: no significant group difference (p = 0.88)                                                                                                                             | Temporal evenness: no significant group difference (p = 0.88)                                                                                                                             |  |
| Ste-Marie et al., 2004 [25] Experiment 1 | Children from 3 1st grade classes from 2 Catholic elementary schools (21 females: mean age = 6.3 yrs., SD = 0.43 yrs.; 23 males: mean age = 6.2 yrs., SD = 0.55 yrs.) | Handwriting tasks                                                                 | 1 session (35 minutes) / 72 trials (24 trials / symbol) | After 30 minutes                                             | After 30 minutes                                             | After 30 minutes                                             | No significant group difference blocked (mean ± SD = 2.42 ± 0.95) = random (mean ± SD = 2.26 ± 0.86) (F <sub>1,42</sub> = 3.2, MSE = 1.9, p = 0.08) | Random > blocked (for both retention groups) (F <sub>1,42</sub> = 4.2, MSE = 1.29, p = not reported)                                  | NA                                                                                                                                                                                        | NA                                                                                                                                                                                        | NA                                                                                                                                                                                        | NA                                                                                                                                                                                        |  |
|                                          |                                                                                                                                                                       |                                                                                   | Tasks themselves                                        | Tasks themselves (either in blocked or random order)         | Tasks themselves (either in blocked or random order)         | NA                                                           |                                                                                                                                                     |                                                                                                                                       |                                                                                                                                                                                           |                                                                                                                                                                                           |                                                                                                                                                                                           |                                                                                                                                                                                           |  |
|                                          |                                                                                                                                                                       |                                                                                   | Scores (scoring of the handwritten symbols)             | Scores (scoring of the handwritten symbols)                  | Scores (scoring of the handwritten symbols)                  | NA                                                           |                                                                                                                                                     |                                                                                                                                       |                                                                                                                                                                                           |                                                                                                                                                                                           |                                                                                                                                                                                           |                                                                                                                                                                                           |  |
| Ste-Marie et al., 2004 [25] Experiment 2 | Children, recruited from 2 schools (mean age = 6.90 yrs., SD = 0.51 yrs.)                                                                                             | Handwriting tasks                                                                 | 1 session (35 minutes) / 72 trials                      | After 20 minutes / After 24 hours (after the retention test) | After 20 minutes / After 24 hours (after the retention test) | After 20 minutes / After 24 hours (after the retention test) | Random > blocked (trial sets 2, 3, 4) Blocked = random (trial sets 1, 5, 6, 7, 8) (F <sub>7,322</sub> = 3.2, MSE = 0.67, p = not reported)          | 20 minutes retention: significant letter x group interaction (F <sub>3,92</sub> = 3.4, MSE = 0.090)                                   | 20 minutes transfer: random (mean ± SD = 23.8 ± 5.7 s) blocked (mean ± SD = 28.3 ± 6.2 s) (F <sub>1,46</sub> = 4.4, MSE = 1.65.6)                                                         | 20 minutes retention: significant letter x group interaction (F <sub>3,92</sub> = 3.4, MSE = 0.090)                                                                                       | 20 minutes transfer: random (mean ± SD = 25.9 ± 4.8 s) > blocked (mean ± SD = 28.2 ± 5.5 s) (F <sub>1,46</sub> = 8.7, MSE = 91.5)                                                         | 20 minutes transfer: random (mean ± SD = 23.8 ± 5.7 s) blocked (mean ± SD = 28.3 ± 6.2 s) (F <sub>1,46</sub> = 4.4, MSE = 1.65.6)                                                         |  |
|                                          |                                                                                                                                                                       |                                                                                   | Tasks themselves                                        | Tasks themselves (either in blocked or random order)         | Tasks themselves (either in blocked or random order)         | Same tasks (same letters but in cursive script continuously) |                                                                                                                                                     |                                                                                                                                       |                                                                                                                                                                                           |                                                                                                                                                                                           |                                                                                                                                                                                           |                                                                                                                                                                                           |  |
|                                          |                                                                                                                                                                       |                                                                                   | Scores (scoring of the handwritten symbols)             | Scores (scoring of the handwritten symbols)                  | Scores (scoring of the handwritten symbols)                  | Time taken to write the word                                 |                                                                                                                                                     |                                                                                                                                       |                                                                                                                                                                                           |                                                                                                                                                                                           |                                                                                                                                                                                           |                                                                                                                                                                                           |  |
| Ste-Marie et al., 2004 [25] Experiment 3 | Children, recruited from 5 schools (Montessori, public and Catholic school) (mean age = 6.42 yrs., SD = 0.40 yrs.)                                                    | Handwriting tasks (one-to-one-situation, two experimenters, each testing a child) | 1 session (35 minutes) / 72 trials                      | After 20 minutes / After 24 hours (after the retention test) | After 20 minutes / After 24 hours (after the retention test) | After 20 minutes / After 24 hours (after the retention test) | No significant group difference                                                                                                                     | 20 minutes retention: no significant group difference blocked (mean ± SD = 3.60 ± 0.97) = random (mean ± SD = 4.30 ± 0.83) (p = 0.10) | 20 minutes retention: no significant group difference blocked (mean ± SD = 22.91 ± 7.22 s) > blocked (mean ± SD = 28.41 ± 9.46 s) (F <sub>1,66</sub> = 7.2, MSE = 69.9, p = not reported) | 20 minutes retention: no significant group difference blocked (mean ± SD = 22.91 ± 7.22 s) > blocked (mean ± SD = 28.41 ± 9.46 s) (F <sub>1,66</sub> = 7.2, MSE = 69.9, p = not reported) | 20 minutes retention: no significant group difference blocked (mean ± SD = 22.91 ± 7.22 s) > blocked (mean ± SD = 28.41 ± 9.46 s) (F <sub>1,66</sub> = 7.2, MSE = 69.9, p = not reported) | 20 minutes retention: no significant group difference blocked (mean ± SD = 22.91 ± 7.22 s) > blocked (mean ± SD = 28.41 ± 9.46 s) (F <sub>1,66</sub> = 7.2, MSE = 69.9, p = not reported) |  |
|                                          |                                                                                                                                                                       |                                                                                   | Tasks themselves                                        | Tasks themselves (either in blocked or random order)         | Tasks themselves (either in blocked or random order)         | Same tasks (same letters but in cursive script continuously) |                                                                                                                                                     |                                                                                                                                       |                                                                                                                                                                                           |                                                                                                                                                                                           |                                                                                                                                                                                           |                                                                                                                                                                                           |  |
|                                          |                                                                                                                                                                       |                                                                                   | Scores (scoring of the handwritten symbols)             | Scores (scoring of the handwritten symbols)                  | Scores (scoring of the handwritten symbols)                  | Time taken to write the word                                 |                                                                                                                                                     |                                                                                                                                       |                                                                                                                                                                                           |                                                                                                                                                                                           |                                                                                                                                                                                           |                                                                                                                                                                                           |  |

(Continued)

Table 1. (Continued)

| Study                      | Description                                                  |                                                                                | Acquisition                                                                                                                                       |                                       | Retention                                                 |                                                                                                      | Transfer                                                         |                                                                                                                                                                                                                                                                                                                                                                                                                                                                                                                                                 | Results                                                                                                                                                                                                                                                                                                                                                                                                                                     |           |          |
|----------------------------|--------------------------------------------------------------|--------------------------------------------------------------------------------|---------------------------------------------------------------------------------------------------------------------------------------------------|---------------------------------------|-----------------------------------------------------------|------------------------------------------------------------------------------------------------------|------------------------------------------------------------------|-------------------------------------------------------------------------------------------------------------------------------------------------------------------------------------------------------------------------------------------------------------------------------------------------------------------------------------------------------------------------------------------------------------------------------------------------------------------------------------------------------------------------------------------------|---------------------------------------------------------------------------------------------------------------------------------------------------------------------------------------------------------------------------------------------------------------------------------------------------------------------------------------------------------------------------------------------------------------------------------------------|-----------|----------|
|                            | Participants<br><i>n</i> total<br><i>n</i> group             | Task/skill                                                                     | Timeframe                                                                                                                                         | Outcome measure                       | Timeframe                                                 | Outcome measure                                                                                      | Timeframe                                                        | Outcome measure                                                                                                                                                                                                                                                                                                                                                                                                                                                                                                                                 | Acquisition                                                                                                                                                                                                                                                                                                                                                                                                                                 | Retention | Transfer |
|                            |                                                              |                                                                                | Outcome parameter                                                                                                                                 | Outcome parameter                     | Outcome parameter                                         | Outcome parameter                                                                                    |                                                                  |                                                                                                                                                                                                                                                                                                                                                                                                                                                                                                                                                 |                                                                                                                                                                                                                                                                                                                                                                                                                                             |           |          |
| Wegman, 1999 [44]          | Female 4th grade students (mean age = NA, SD = NA)           | Ball rolling, racket striking, ball kicking                                    | 1 session (45 minutes)<br>39 trials<br>(13 trials / task)                                                                                         | NA                                    | After 3 weeks                                             | NA                                                                                                   | NA                                                               | Ball rolling:<br>no significant group difference:<br>(mean ± SD = 58.12 ± 16.21) = blocked<br>random<br>(mean ± SD = 55.00 ± 18.85) (F <sub>2,49</sub> = 0.34, p > 0.05)<br>Racket striking:<br>blocked<br>random<br>(mean ± SD = 74.16 ± 11.91) > blocked<br>(mean ± SD = 54.41 ± 20.45) (F <sub>2,49</sub> = 4.73, p < 0.05)<br>posttest: F1,31 = 7.41, p < 0.05)<br>Ball kicking:<br>no significant group difference:<br>blocked<br>(mean ± SD = 50.62 ± 21.74) = random<br>(mean ± SD = 48.68 ± 20.53) (F <sub>2,49</sub> = 0.24, p > 0.05) | Ball rolling:<br>blocked<br>(mean ± SD = 64.41 ± 17.75) > random<br>(mean ± SD = 48.94 ± 17.76) (F <sub>2,53</sub> = 4.63, p < 0.05)<br>Racket striking:<br>blocked<br>random<br>(mean ± SD = 66.47 ± 6.31) > blocked<br>(mean ± SD = 59.16 ± 11.78) (F <sub>2,53</sub> = 3.22, p < 0.05)<br>Ball kicking:<br>blocked<br>random<br>(mean ± SD = 63.75 ± 6.19) > blocked<br>(mean ± SD = 52.63 ± 20.77) (F <sub>2,52</sub> = 3.35, p < 0.05) | NA        | NA       |
|                            |                                                              |                                                                                | Total: 54<br>Repetitions: NA<br>Random: NA<br>Combined: NA                                                                                        | Tasks themselves<br>Scores (accuracy) | Tasks themselves<br>Scores (accuracy)                     | NA                                                                                                   | NA                                                               | NA                                                                                                                                                                                                                                                                                                                                                                                                                                                                                                                                              | NA                                                                                                                                                                                                                                                                                                                                                                                                                                          | NA        | NA       |
| Wrisberg & Mead, 1983 [45] | Right handed children (mean age = 7 yrs., 2 months, SD = NA) | Anticipation timing task (visual tracking of a moving light, different speeds) | 2 days<br>1 session / day<br>48 trials / day                                                                                                      | NA                                    | NA                                                        | After one day<br>20 trials                                                                           | No significant group effect (F <sub>3,40</sub> = 0.37, p > 0.05) | NA                                                                                                                                                                                                                                                                                                                                                                                                                                                                                                                                              | NA                                                                                                                                                                                                                                                                                                                                                                                                                                          | NA        |          |
|                            |                                                              |                                                                                | Total: 60<br>Slow speed: 12*<br>Fast speed: 12*<br>Varied-random: 12*<br>Varied-blocked: 12*<br>Control: 12*<br>Equal number of females and males | Task itself<br>Mean absolute error    | Task itself<br>Mean constant error<br>Mean variable error | Task itself, 2 different speeds<br>Mean absolute error<br>Mean constant error<br>Mean variable error | NA                                                               | NA                                                                                                                                                                                                                                                                                                                                                                                                                                                                                                                                              | NA                                                                                                                                                                                                                                                                                                                                                                                                                                          | NA        | NA       |

(Continued)



Table 1. (Continued)

| Study                   | Description                                                                                                                         |                                        | Acquisition                                                   |                                                                       | Retention         |                                                                       | Transfer          |                   | Results                                                                                                                                                                                                                                                                                                       |                                                                                                                                                                                                                                                                                                               |    |
|-------------------------|-------------------------------------------------------------------------------------------------------------------------------------|----------------------------------------|---------------------------------------------------------------|-----------------------------------------------------------------------|-------------------|-----------------------------------------------------------------------|-------------------|-------------------|---------------------------------------------------------------------------------------------------------------------------------------------------------------------------------------------------------------------------------------------------------------------------------------------------------------|---------------------------------------------------------------------------------------------------------------------------------------------------------------------------------------------------------------------------------------------------------------------------------------------------------------|----|
|                         | Participants                                                                                                                        | Task/skill                             | Timeframe                                                     | Outcome measure                                                       | Timeframe         | Outcome measure                                                       | Timeframe         | Outcome measure   | Acquisition                                                                                                                                                                                                                                                                                                   | Retention                                                                                                                                                                                                                                                                                                     |    |
|                         | n total<br>n group                                                                                                                  |                                        | Outcome parameter                                             | Outcome parameter                                                     | Outcome parameter | Outcome parameter                                                     | Outcome parameter | Outcome parameter |                                                                                                                                                                                                                                                                                                               |                                                                                                                                                                                                                                                                                                               |    |
| Zetou et al., 2007 [46] | Female, unskilled volleyball players (mean age = 12.4 yrs., SD = 1.2)<br>Total: 26<br>Low interference: 13<br>High interference: 13 | Volleyball skills (set, pass, service) | 10 weeks<br>2 sessions / week (75 minutes and 72 trials each) | Tasks themselves<br>Scores (ability to play the ball, hitting target) | After 2 weeks     | Tasks themselves<br>Scores (ability to play the ball, hitting target) | NA                | NA                | Set:<br>no significant group difference (main effect for group: $F_{1,24} = 0.11$ , $p = 0.74$ )<br>Pass:<br>no significant group difference (main effect for group: $F_{1,24} = 0.04$ , $p = 0.84$ )<br>Service:<br>no significant group difference (main effect for group: $F_{1,24} = 0.04$ , $p = 0.85$ ) | Set:<br>no significant group difference (main effect for group: $F_{1,24} = 0.11$ , $p = 0.74$ )<br>Pass:<br>no significant group difference (main effect for group: $F_{1,24} = 0.04$ , $p = 0.84$ )<br>Service:<br>no significant group difference (main effect for group: $F_{1,24} = 0.04$ , $p = 0.85$ ) | NA |

Results: between-groups-effects (blocked vs. random practice) were evaluated. If additional groups (e.g. serial, repetitive) were evaluated, these results were not considered. Abbreviations:

ACE = absolute constant error; CA = chronological age; CI = contextual interference; CP = cerebral palsy; DS = Down's Syndrome; IDD = intellectual developmental disability; LD = learning

disabilities; m = meters; MA = mental age; ms = milliseconds; MSE = mean square error; n = number; NA = not applicable; SD = standard deviation; TD = typically developing; yr./yrs. = year/years;

> meaning "better than".

\*n per group is not mentioned in the paper, the information was given by the authors answering to our e-mail.

<https://doi.org/10.1371/journal.pone.0209979.t001>

Table 2. Levels of evidence and conduct quality.

| Study                                    | Evidence level | Quality           |    |    |     |     |    |     |    |
|------------------------------------------|----------------|-------------------|----|----|-----|-----|----|-----|----|
|                                          |                | Conduct questions |    |    |     |     |    |     |    |
|                                          |                | Summary           | 1  | 2  | 3   | 4   | 5  | 6   | 7  |
| Bertollo et al., 2010 [29]               | II             | 0/7               | no | no | no  | no  | no | no  | no |
| Bortoli et al., 1992 [30]                | II             | 0/7               | no | no | no  | no  | no | no  | no |
| Broadbent et al., 2015 [31]              | III            | 2/7               | no | no | yes | no  | no | yes | no |
| Del Rey et al., 1983 [32]                | III            | 0/7               | no | no | no  | no  | no | no  | no |
| Duff et al., 2003 [28]                   | II             | 0/7               | no | no | no  | no  | no | no  | no |
| Edwards et al., 1986 [6]                 | II             | 0/7               | no | no | no  | no  | no | no  | no |
| Fialho et al., 2006 [33]                 | III            | 0/7               | no | no | no  | no  | no | no  | no |
| French et al., 1990 [34]                 | I              | 0/7               | no | no | no  | no  | no | no  | no |
| Gophna et al., 2007 [26]                 | II             | 0/7               | no | no | no  | no  | no | no  | no |
| Granda Vera & Montilla, 2003 [35]        | III            | 0/7               | no | no | no  | no  | no | no  | no |
| Green et al., 1995 [36]                  | II             | 0/7               | no | no | no  | no  | no | no  | no |
| Jarus & Goreover, 1999 [37]              | III            | 0/7               | no | no | no  | no  | no | no  | no |
| Jarus & Gutman, 2001 [14]                | III            | 0/7               | no | no | no  | no  | no | no  | no |
| Jones & French, 2007 [38]                | II             | 1/7               | no | no | no  | no  | no | yes | no |
| Meira & Tani, 2003 [39]                  | II             | 0/7               | no | no | no  | no  | no | no  | no |
| Painter et al., 1994 [27]                | II             | 0/7               | no | no | no  | no  | no | no  | no |
| Perez et al., 2005 [40]                  | II             | 0/7               | no | no | no  | no  | no | no  | no |
| Pigott & Shapiro, 1984 [7]               | III            | 0/7               | no | no | no  | no  | no | no  | no |
| Pollock & Lee, 1997 [41]                 | II             | 0/7               | no | no | no  | no  | no | no  | no |
| Saemi et al., 2012 [42]                  | II             | 0/7               | no | no | no  | no  | no | no  | no |
| Stambaugh, 2011 [43]                     | II             | 0/7               | no | no | no  | no  | no | no  | no |
| Ste-Marie et al., 2004 [25] Experiment 1 | II             | 1/7               | no | no | no  | yes | no | no  | no |
| Ste-Marie et al., 2004 [25] Experiment 2 | II             | 2/7               | no | no | no  | yes | no | yes | no |
| Ste-Marie et al., 2004 [25] Experiment 3 | II             | 2/7               | no | no | no  | yes | no | yes | no |
| Wegman, 1999 [44]                        | II             | 0/7               | no | no | no  | no  | no | no  | no |
| Wrisberg & Mead, 1983 [45]               | III            | 0/7               | no | no | no  | no  | no | no  | no |
| Zetou et al., 2007 [46]                  | II             | 0/7               | no | no | no  | no  | no | no  | no |

Evidence levels and scoring of the conduct questions of all the included studies. Evidence levels: level I = randomised controlled trials (sample size > 100); level II randomised controlled trials (sample size < 100); level III: controlled cohort studies; level IV: case series; level V: expert opinions [15]. Conduct questions: 1) inclusion and exclusion criteria, 2) description of and adherence to the intervention, 3) validity and reliability of outcome measures, 4) masking of the participants and assessors, 5) statistical analysis, 6) dropouts, 7) controlling for confounding variables. [15]

<https://doi.org/10.1371/journal.pone.0209979.t002>

which makes it difficult to formulate recommendations whether children with brain lesions or typically developing children would profit more from a blocked or random approach.

### Contextual interference in children with hemiplegic cerebral palsy

The one study examining children with hemiplegic CP (n = 18, mean age 10 years, SD 1.8) also included a group of age-matched typically developing peers (n = 18, mean age 10.4 years, SD 1.7 years) [28]. The study consisted of two experiments. In the first experiment, children lifted various known objects while the vertical lifting load force was measured. The second

**Table 3. Best evidence synthesis according to tasks, learning level and practice order.**

| Area                            |                             | Task                                           | Study                                    | Evidence synthesis per study |           |          | Evidence synthesis summary |           |          |
|---------------------------------|-----------------------------|------------------------------------------------|------------------------------------------|------------------------------|-----------|----------|----------------------------|-----------|----------|
|                                 |                             |                                                |                                          | Acquisition                  | Retention | Transfer | Acquisition                | Retention | Transfer |
| NLT                             | FMT                         | Mirror tracing task                            | Gopna et al., 2007 [26]                  | NS/NR                        | NS        | NS       | -                          | -         | -        |
|                                 |                             | Playing clarinet                               | Stambaugh, 2011[43]                      | IC                           | IC        | NS       | X                          | X         | -        |
|                                 |                             | Handwriting skills                             | Ste-Marie et al., 2004 [25] Experiment 1 | NS                           | R         | NA       | X                          | X         | **<br>R  |
|                                 |                             |                                                | Ste-Marie et al., 2004 [25] Experiment 2 | IC                           | IC        | R        |                            |           |          |
|                                 |                             |                                                | Ste-Marie et al., 2004 [25] Experiment 3 | NS                           | NS        | R        |                            |           |          |
|                                 | GMT                         | Throwing beanbags                              | Jarus & Goreover, 1999 [37]              | IC                           | IC        | IC       | X                          | X         | X        |
|                                 |                             |                                                | Jarus & Gutman, 2001 [14]                | IC                           | NS        | NS       |                            |           |          |
|                                 |                             |                                                | Painter et al., 1994 [27]                | NS/NR                        | NS/NR     | NA       |                            |           |          |
|                                 |                             |                                                | Pigott & Shapiro, 1984 [7]               | NS                           | NA        | NS       |                            |           |          |
|                                 |                             | Throwing different balls                       | Granda Vera & Montilla, 2003 [35]        | IC                           | R         | R        | X                          | *<br>R    | *<br>R   |
|                                 |                             | Throwing tennis balls                          | Saemi et al., 2012 [42]                  | NS                           | NS        | NA       | -                          | -         | NA       |
|                                 |                             | Volleyball                                     | Bortoli et al., 1992 [30]                | NS                           | NS        | IC       | -                          | -         | X        |
|                                 |                             |                                                | Fialho et al., 2006 [33]                 | NS/NR                        | NA        | IC       |                            |           |          |
|                                 |                             |                                                | French et al., 1990 [34]                 | NS                           | NS        | NA       |                            |           |          |
|                                 |                             |                                                | Jones & French, 2007 [38]                | NS                           | NS        | NA       |                            |           |          |
|                                 |                             |                                                | Meira & Tani, 2003 [39]                  | NS                           | NA        | NS       |                            |           |          |
|                                 |                             |                                                | Zetou et al., 2007 [46]                  | NS                           | NS        | NA       |                            |           |          |
|                                 |                             | Hitting different balls with different rackets | Green et al., 1995 [36]                  | NS                           | NA        | IC       | -                          | NA        | X        |
|                                 |                             | Lifting unfamiliar objects                     | Duff et al., 2003 [28]                   | NR                           | NR        | NA       | -                          | -         | NA       |
|                                 |                             | Dance step sequence                            | Bertollo et al., 2010 [29]               | B                            | NS        | NA       | *<br>B                     | -         | NA       |
| Propelling task                 | Pollock & Lee, 1997 [41]    | NS                                             | NR                                       | NR                           | -         | -        | -                          |           |          |
| Tennis                          | Broadbent et al., 2015 [31] | NS                                             | R                                        | IC                           | -         | *<br>R   | X                          |           |          |
| Ball rolling, striking, kicking | Wegman, 1999 [44]           | B                                              | IC                                       | NA                           | *<br>B    | X        | NA                         |           |          |
| LT                              | FMT                         | Anticipation timing task                       | Del Rey et al., 1983 [32]                | B                            | NA        | NS       | X                          | NA        | X        |
|                                 |                             |                                                | Edwards et al., 1986 [6]                 | NR                           | NA        | IC       |                            |           |          |
|                                 |                             |                                                | Wrisberg & Mead, 1983 [45]               | NS                           | NA        | IC       |                            |           |          |
|                                 | Positioning motor task      | Perez et al., 2005 [40]                        | B                                        | IC                           | NA        | *<br>B   | X                          | NA        |          |

Abbreviations: NLT = Non-laboratory tasks; LT = Laboratory tasks; FMT = Fine-motor tasks GMT = Gross motor tasks; B = significant, favouring blocked order; IC = inconsistent; NA = not applicable, no study evaluated the according aspect; NR = not reported; NS = not significant; R = significant, favouring random order. Evaluation of the studies: Results of the single studies were evaluated taking in account the typically developing children and all parameters and tasks into account. Results with ≥ 75% of the comparisons favouring one practice order were evaluated as consistent evidence within one study. Evaluation of the tasks: Results of the according studies were merged if ≥ 75% of the studies of one task showed the same result, evidence was rated as consistent. Strength of the evidence (adapted from Tulder et al. [24]):

\*\*\* = Strong—consistent findings among multiple high quality randomised controlled trials (RCTs)

\*\* = Moderate—consistent findings among multiple low quality RCTs and/or controlled clinical trials (CCTs) and/or high one high quality RCT

\* = Limited—one low quality RCT and/or CCT

X = Conflicting—inconsistent findings among multiple trials (RCTs and/or CCTs); inconsistent findings among different parameters within one trial (if only one trial is available)

- = No evidence from trials—no RCTs or CCTs

<https://doi.org/10.1371/journal.pone.0209979.t003>

experiment investigated the contextual interference effect. The participants lifted three novel objects with varying weights 27 times. One group did this in blocked order, the other group in random order. Retention was tested immediately after and 24 hours after the practice phase. While during acquisition blocked practice resulted in better differentiation of force rates between the different objects, there was no difference during the retention trials between the practice groups. Based on these two experiments the authors concluded that children with hemiplegic CP have an internal picture of the weight of familiar objects, that they can learn and retain to provide the right amount of force when lifting objects with unknown weights, but that the amount of practice rather than the practice order is essential for this learning process [28]. A conclusion about the contextual interference effect in children with CP is difficult, though, because this was the only study we found and it had some qualitative shortcomings. In the methodological quality assessment, this study received 0 of 7 points (Table 2) and the risk of bias was high. The main reasons for our low rating of this study were the lack of information about the control group at baseline (only the means of the whole groups are reported without a measure of variation), the missing information about the adherence, the psychometric properties of the assessments were not reported, it was unclear whether assessors were masked, the lack of a power calculation, and the number of drop-outs were not reported.

### Contextual interference in typically developing children

When considering contextual interference studies with typically developing children, a conclusion also remains unclear. Although the best evidence synthesis showed limited to moderate support of the contextual interference effect for some of the tasks (favouring random practice for better retention and transfer), in the majority of the tasks no evidence (acquisition:  $n = 7/15$ , retention:  $6/13$ , transfer:  $n = 3/10$ ) or conflicting evidence (acquisition:  $n = 5/15$ , retention:  $n = 5/13$ , transfer:  $n = 5/10$ ) was found (Table 3). Besides the low methodological quality, several factors could have affected the contextual interference effect contributing to the inconclusiveness of some results [2].

### The influence of types of skills and variations

One of these factors might be the kind of skill and its variations that were studied. For example, Magill and Hall already discussed that the generalisability of the contextual interference effect could be influenced by task characteristics like laboratory tasks, such as coincident anticipation timing tasks, versus motor skill performance outside the laboratory or non-laboratory tasks, such as throwing beanbags [5].

In our review, we found four studies that investigated laboratory tasks, namely anticipation timing tasks [6,32,45], and a positioning motor task [40]. The other studies investigated non-laboratory tasks: six examined volleyball skills [30,33,34,38,39,46], four beanbag throwing [7,14,27,37], and three experiments investigated handwriting skills [25]. Further tasks were dance step sequences [29], tennis skills [31], lifting unfamiliar objects [28], mirror tracing tasks [26], throwing different balls [35], hitting different balls with different rackets [36], rolling, striking and hitting balls [44], a propelling task (Crokinole game) [41], throwing tennis balls [42], and playing the clarinet [43].

From a therapeutic point of view, this change of interest from laboratory to non-laboratory tasks is desired. While learning a laboratory task can reflect the capacity of the child, i.e. what a person with a health condition actually is able to do, learning non-laboratory tasks may better resemble daily life activities, i.e. performance (what a person does in his/her usual environment, e.g. skills or tasks needed for self-care, leisure activities, school or work), as described by

the World Health Organisation's International Classification of Functioning, Disability and Health (ICF) [47]. Practicing non-laboratory tasks might improve the translation to other daily life relevant tasks, as these tasks might appear more natural and are probably more frequently occurring in the child's daily routines than laboratory tasks.

In healthy adults, the evidence is mixed when practicing laboratory tasks, but practicing non-laboratory tasks supports the contextual interference effect [5]. In our review, the best evidence synthesis shows limited to moderate support for the contextual interference effect in five non-laboratory and one laboratory task (Table 3). However, only in a "throwing different balls" [35] task, we found the contextual interference effect for both the retention and transfer. In summary, a clear differentiation about how laboratory or non-laboratory tasks support the contextual interference effect in children cannot be determined.

### The influence of experience, age and task difficulty

In adults, it is suggested that the learner needs to have an idea of the movement or some initial experience to profit from variations of the practice schedule, but the relation between age and the contextual interference remains unclear [5]. In children, Jarus and Goreover observed a difference between three age groups (5 years, 7 years, and 11 years) who practiced beanbag throwing [37]. In general, older children performed the bean bag throwing task better. While the group of 7-year-old children acquired and retained better during blocked practice, there was no difference between the practice groups during the transfer [37]. Hence, for this task, blocked practice might be more beneficial for this age group. While the authors argued that this finding could be explained by the low experience level and the young age of the 7-year-old children, these observations were not made for the 5-year-old children, which is not in line with the author's explanation. Furthermore, Pollock and Lee compared the learning of propelling a small wooden disk with the middle finger (an adaptation of the Crokinole game) between children and adults [41]. They could reconstruct the contextual interference effect in adults and also in children during transfer and retention, but the children showed no difference in task acquisition between the blocked and random groups [41]. Apparently, this pattern has been observed in adults practicing a difficult task and can be explained with a benefit of blocked practice during acquisition of easy tasks only [2,48].

If the difficulty level of a task seems to influence only the acquisition but not the retention and transfer in adults, the random practice order can be recommended in adults, regardless whether the task is simple or difficult. In typically developing children, though, we cannot make such a recommendation, because the evidence is unclear as experience, age, and task difficulty intermingle with each other. It becomes even more complicated when trying to generalise the effects of experience, age, and task difficulty on the contextual interference effect to children with congenital or acquired brain lesions. For example, the question of whether children in neurorehabilitation are novices or whether they are experienced has to be considered carefully. Given that children with congenital brain lesions or acquired brain lesions in a chronic state have had therapy for most of their lives or for a long time, respectively, they could be considered an expert group. Children with a (sub-) acute acquired brain injury most likely could, on the one hand, be regarded as novices when it comes to relearning motor activities of daily life with their impaired sensorimotor and cognitive systems. On the other hand, they might have performed all these activities independently before they experienced the brain injury which puts them on another starting point compared to children with congenital brain lesions. All these aspects need to be incorporated when considering the contextual interference effect in paediatric neurorehabilitation.

## Can knowledge about related populations be transferred to children with brain lesions?

The evidence about the contextual interference in typically developing children is limited, yet, more extensive compared to the evidence available for children with brain lesions. In adults with brain lesions, the results are not clearly supporting the contextual interference effect. In adults with chronic stroke, for example, the typical contextual interference effect could not be reconstructed when performing three specific movements (wrist/finger extension, elbow joint extension, and shoulder joint abduction) combined with active neuromuscular stimulation [49]. When practicing a task that was designed to approximate the steps needed take a coffee cup out of the cupboard and put it on the table, the random practice outperformed the blocked group in stroke patients [50]. Schweighofer et al. [51] concluded that these conflicting results might be due to the lack of separation of the patients between high and low working memory capabilities. In their study, individuals with stroke with normal visuospatial working memory retained visuomotor skills better when practicing in random order compared to blocked order, while in participants with low visuospatial working memory retention performance did not differ between practice groups [51]. It seems that also in adults with brain injury results might be influenced by other factors additional to the practice order.

We assume that results obtained in typically developing children (compared to healthy adults) could be better generalised to children with brain lesions. Nevertheless, we should be cautious, because, firstly, the physical requirements are different: damaged sensory pathways and structures involved in processing sensory information, such as found in children with brain lesions, reduce the ability to detect errors and consequently impair motor learning [52,53]. Secondly, learning a motor task with a damaged brain is likely different from learning with an intact, typically developing brain. This stands in contrast with previous observations in adults with a unilateral stroke which suggested that the stroke affected the control and execution, but not the learning of motor skills per se [54]. However, as this issue is under debate, there is still no definite agreement which brain regions and processes are involved in learning and how the learning processes are executed (e.g. [55–57]). Furthermore, the individual lesion areas in combination with many other factors make every patient and their learning abilities and strategies unique. Therefore, further research is needed to understand the relation of pathological changes and motor learning disorders [58]. Thirdly, it has been shown that physiotherapists perceive primary impairments (e.g. muscle tone, movement patterns) and secondary outcomes (e.g. range of motion, joint alignment, muscle strength), as well as personal factors (e.g. motivation) and environmental factors (e.g. support and expectations from the family) as important factors influencing the acquisition of motor abilities in children with CP [59]. These factors could slow down or even hinder learning in children with brain lesions compared to typically developing children.

## The methodological quality of the studies

A reconstruction of the methodological approach was challenging in many studies. It was often unclear whether certain methodological aspects were poorly performed or just poorly described. This influenced our assessment of bias and quality. For example, the psychometric properties of the applied outcome measures were unknown or not reported. Several studies mentioned reliability evaluations of their measures, while information on validity or absolute measurements errors (such as the standard error of measurement) was missing. Also, the description of the appropriate statistics and power calculation (both are needed to score a “yes”) was missing. Only one study mentioned a power analysis but did not present it [37].



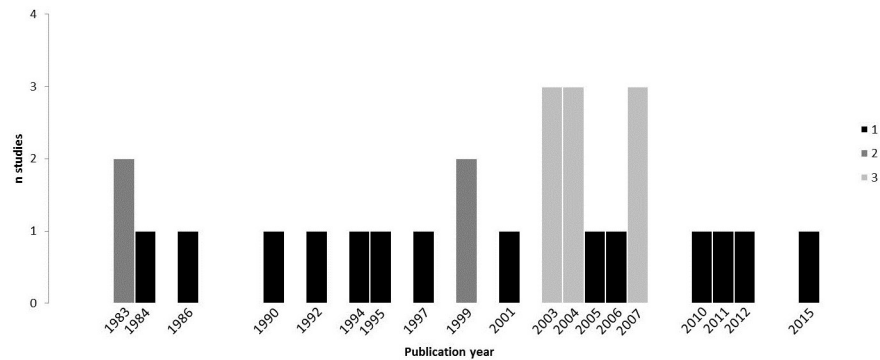

**Fig 2. The distribution of the publication years of the articles included in this systematic review.**

<https://doi.org/10.1371/journal.pone.0209979.g002>

The oldest papers we included in this review were published in the 1980ies (Fig 2). The Standardised Reporting of Trials (SORT) Statement [60] was published in 1994. Before that checklists for interventional trials were not available. This might partly explain why the older studies did not report all aspects systematically and were therewith rated low in the quality evaluation.

### Limitations

There are some limitations of this systematic review which need to be mentioned. Our literature search was limited to seven databases and restricted to published articles only. Grey literature was not considered. We excluded studies which performed a proceeding familiarisation phase prior to the actual practice phase, whether or not this affects the learning remains to be discussed. For the best evidence synthesis, we did not subdivide the study results according to long- or short-term learning phases because there were not enough comparable studies to build subgroups. This asks for a cautious interpretation of the results.

### Recommendations for future research

We expect that the contextual interference effect in children with brain lesions can influence rehabilitation outcomes. Therefore, we would recommend to design such studies and include these particular patient groups. A careful selection of the motor task to be studied is crucial: it should be clinically relevant and motivating for the child to perform and it should provide objective parameters to quantify the retention or transfer of the task or skill particularly, as these are most relevant for the child after discharge from rehabilitation. The study should be designed and its results reported in accordance with the various internationally accepted checklists to ensure high study quality and low bias.

### Conclusion

To recapitulate, there is a persistent demand for increasing our knowledge about the contextual interference effect in children, especially, in children with brain lesions, as the number of existing studies is small, and the methodological quality of the studies is low. For some tasks, we found limited evidence supporting the contextual interference effect in typically developing children. However, we would be cautious in generalising these results to children with brain lesions. To improve movement or sports programmes in typically developing children and

advance rehabilitation programmes for children with brain lesions, there is an emerging need to increase our knowledge of the contextual interference effect in these populations.

## Supporting information

**S1 Table. Example of the search strategy used for the primary search on PsycINFO.**

(DOCX)

**S2 Table. Levels of evidence.** Levels of evidence in intervention or group studies and single-case design studies according to the American Academy for Cerebral Palsy and Developmental Medicine (AACPDMD) [15]. Abbreviations: ATD = alternating treatment design; MB = multiple baseline; MBD = multiple baseline design; n = number; RCT = randomised controlled trial; SSRD = single subject research design.

(DOCX)

**S3 Table. Conduct questions.** Questions to evaluate the methodology of an intervention study according to the American Academy for Cerebral Palsy and Developmental Medicine [15].

(DOCX)

**S4 Table. The Cochrane Collaboration's tool for assessing the risk of bias.** The risk of bias tool, presented by the Cochrane handbook for systematic reviews of interventions [16].

(DOCX)

**S5 Table. PRISMA checklist.**

(DOC)

## Acknowledgments

We would like to thank all the authors, who responded to our e-mails and providing us with more information about their studies. A very special thank you goes to Yvonne Perathoner and Martina Hediger, the librarians of the library of the Children's University Hospital Zurich, who supported our search and ordered copies of all the papers we asked for.

## Author Contributions

**Conceptualization:** Judith V. Graser.

**Formal analysis:** Judith V. Graser.

**Funding acquisition:** Hubertus J. A. van Hedel.

**Investigation:** Judith V. Graser, Caroline H. G. Bastiaenen, Hubertus J. A. van Hedel.

**Methodology:** Judith V. Graser, Caroline H. G. Bastiaenen, Hubertus J. A. van Hedel.

**Project administration:** Judith V. Graser.

**Resources:** Hubertus J. A. van Hedel.

**Validation:** Judith V. Graser, Caroline H. G. Bastiaenen, Hubertus J. A. van Hedel.

**Visualization:** Judith V. Graser.

**Writing – original draft:** Judith V. Graser.

**Writing – review & editing:** Judith V. Graser, Caroline H. G. Bastiaenen, Hubertus J. A. van Hedel.

## References

1. Rosenbaum P, Paneth N, Leviton A, Goldstein M, Damiano D, Dan B, et al. A report : the definition and classification of cerebral palsy. *Dev Med Child Neurol*. 2006; 49: 8–14.
2. Lee TD, Wulf G, Schmidt RA. Contextual interference in motor learning: dissociated effects due to the nature of task variations. *Q J Exp Psychol Sect A Hum Exp Psychol*. 1992; 44: 627–644. <https://doi.org/10.1080/14640749208401303>
3. Battig W. Intratask interference as a source of facilitation on transfer and retention. In: Voss J, editor. *Topics in learning and performance*. New York: Academic Press; 1972. pp. 131–159.
4. Hodges NJ, Lohse KR, Wilson A, Lim SB, Mulligan D. Exploring the dynamic nature of contextual interference: previous experience affects current practice but not learning. *J Mot Behav*. 2014; 46: 455–67. <https://doi.org/10.1080/00222895.2014.947911> PMID: 25226441
5. Magill RA, Hall KG. A review of the contextual interference effect in motor skill acquisition. *Hum Mov Sci*. 1990; 9: 241–289. [https://doi.org/10.1016/0167-9457\(90\)90005-X](https://doi.org/10.1016/0167-9457(90)90005-X)
6. Edwards JM, Elliot D, Lee TD. Contextual interference effects during skill acquisition and transfer in Down's Syndrome adolescents. *Adapt Phys Act Q*. 1986; 3: 250–258.
7. Pigott RE, Shapiro DC. Motor schema: the structure of the variability session. *Res Q Exerc Sport*. 1984; 55: 41–45. <https://doi.org/10.1080/02701367.1984.10605353>
8. Del Rey P, Whitehurst M, Wughalter E, Barnwell J. Contextual interference and experience in acquisition and transfer. *Percept Mot Skills*. 1983; 57: 241–242. <https://doi.org/10.2466/pms.1983.57.1.241>
9. Brady F. The contextual interference effect and sport skills. *Percept Mot Skills*. 2008; 106: 461–472. <https://doi.org/10.2466/pms.106.2.461-472> PMID: 18556902
10. Brady F. A theoretical and empirical review of the contextual interference effect and the learning of motor skills. *Quest*. 1998; 50: 266–293. <https://doi.org/10.1080/00336297.1998.10484285>
11. Merbah S, Meulemans T. Learning a motor skill: effects of blocked versus random practice—a review. *Psychol Belg*. 2011; 51: 15–48. <https://doi.org/10.5334/pb-51-1-15>
12. Barreiros J, Figueiredo T, Godinho M. The contextual interference effect in applied settings. *Eur Phys Educ Rev*. 2007; 13: 195–208. <https://doi.org/10.1177/1356336X07076876>
13. Kitago T, Krakauer JW. Motor learning principles for neurorehabilitation. *Handb Clin Neurol*. 2013; 110: 93–103. <https://doi.org/10.1016/B978-0-444-52901-5.00008-3> PMID: 23312633
14. Jarus T, Gutman T. Effects of cognitive processes and task complexity on acquisition, retention, and transfer of motor skills. *Can J Occup Ther*. 2001; 68: 280–289. <https://doi.org/10.1177/000841740106800504> PMID: 11765667
15. Darrach J, Hickman R, O'Donnell M, Vogtle L, Wiart L. AACPDM Methodology to develop systematic reviews of treatment interventions (revision 1.2) [Internet]. 2008 pp. 1–30. <https://www.aacpdm.org/UserFiles/file/systematic-review-methodology.pdf>
16. Higgins JPT, Green S, editors. *Cochrane Handbook for Systematic Reviews of Interventions Version 5.1.0* [updated March 2011] [Internet]. The Cochrane Collaboration; 2011. [www.cochrane-handbook.org](http://www.cochrane-handbook.org).
17. Harlow HF. The formation of learning sets. *Psychol Rev*. 1948; 56: 51–65.
18. Seidler RD. Multiple Motor Learning Experiences Enhance Motor Adaptability. *J Cogn Neurosci*. 2004; 16: 65–73. <https://doi.org/10.1162/089892904322755566> PMID: 15006037
19. Braun DA, Aertsen A, Wolpert DM. Motor task variation induces structural learning. *Curr Biol*. 2009; 19: 352–357. <https://doi.org/10.1016/j.cub.2009.01.036> PMID: 19217296
20. Kattner F, Cochrane A, Cox CR, Gorman TE, Green CS. Perceptual learning generalization from sequential perceptual training as a change in learning rate. *Curr Biol*. 2017; 27: 840–846. <https://doi.org/10.1016/j.cub.2017.01.046> PMID: 28262488
21. Bejjanki VR, Zhang R, Li R, Pouget A, Green CS, Lu Z-L, et al. Action video game play facilitates the development of better perceptual templates. *Proc Natl Acad Sci U S A*. 2014; 111: 16961–16966. <https://doi.org/10.1073/pnas.1417056111> PMID: 25385590
22. Brown A, Kane M. Preschool children can learn to transfer: learning to learn and learning from from example. *Cogn Psychol*. 1988; 20: 493–523. PMID: 3191668
23. Giboin L-S, Gruber M, Kramer A. Motor learning of a dynamic balance task: Influence of lower limb power and prior balance practice. *J Sci Med Sport*. 2018; Article in.
24. Van Tulder M, Furlan A, Bombardier C. Updated method guidelines for systematic reviews in the Cochrane Collaboration Back Review Group. *Spine (Phila Pa 1976)*. 2003; 28: 1290–1299.

25. Ste-Marie DM, Clark SE, Findlay LC, Latimer AE. High levels of contextual interference enhance hand-writing skill acquisition. *J Mot Behav.* 2004; 36: 115–126. <https://doi.org/10.3200/JMBR.36.1.115-126> PMID: 14766494
26. Gophna S, Jarus T, Weintraub N. Effects of contextual interference on acquisition, retention and transfer of motor skill of children with and without learning disabilities. *Isr J Occup Ther.* 2007; 16: 89–108.
27. Painter MA, Inman KB, Vincent WJ. Contextual interference effects in the acquisition and retention of motor tasks by individuals with mild mental handicaps. *Adapt Phys Act Q.* 1994; 11: 383–395.
28. Duff S V, Gordon AM. Learning of grasp control in children with hemiplegic cerebral palsy. *Dev Med Child Neurol.* 2003; 45: 746–757. <https://doi.org/10.1017/S0012162203001397> PMID: 14580130
29. Bertollo M, Berchicci M, Carraro A, Comani S, Robazza C. Blocked and random practice organization in the learning of rhythmic dance step sequences. *Percept Mot Skills.* 2010; 110: 77–84. <https://doi.org/10.2466/PMS.110.1.77-84> PMID: 20391872
30. Bortoli L, Robazza C, Durigon V, Carra C. Effects of contextual interference on learning technical sports skills. *Percept Mot Skills.* SAGE Publications; 1992; 75: 555–62. <https://doi.org/10.2466/pms.1992.75.2.555> PMID: 1408620
31. Broadbent DP, Causer J, Ford PR, Williams AM. Contextual interference effect on perceptual–cognitive skills training. *Med Sci Sport Exerc.* 2015; 47: 1243–1250. <https://doi.org/10.1249/MSS.0000000000000530> PMID: 25255127
32. Del Rey P, Whitehurst M, Wood J. Effects of experience and contextual interference on learning and transfer by boys and girls. *Percept Mot Skills.* 1983; 56: 581–582.
33. Fialho JVAP, Benda RN, Ugrinowitsch H. The contextual interference effect in a serve skill acquisition with experienced volleyball players. *J Hum Mov Stud.* 2006; 50: 65–77. Available: [http://apps.webofknowledge.com/full\\_record.do?product=UA&search\\_mode=GeneralSearch&qid=3&SID=S2wJpn5qefOhXR5X25v&page=10&doc=99](http://apps.webofknowledge.com/full_record.do?product=UA&search_mode=GeneralSearch&qid=3&SID=S2wJpn5qefOhXR5X25v&page=10&doc=99)
34. French KE, Rink JE, Werner PH. Effects of contextual interference on retention of three volleyball skills. *Percept Mot Skills.* SAGE Publications; 1990; 71: 179–186. <https://doi.org/10.2466/pms.1990.71.1.179>
35. Granda Vera J, Montilla MM. Practice schedule and acquisition, retention, and transfer of a throwing task in 6-yr.-old children. *Percept Mot Skills.* SAGE Publications; 2003; 96: 1015–24. <https://doi.org/10.2466/pms.2003.96.3.1015> PMID: 12831284
36. Green DP, Whitehead J, Sugden DA. Practice variability and transfer of a racket skill. *Percept Mot Skills.* 1995; 81: 1275–1281. <https://doi.org/10.2466/pms.1995.81.3f.1275> PMID: 8684925
37. Jarus T, Goreover Y. Effects of contextual interference and age on acquisition, retention, and transfer of motor skill. *Percept Mot Skills.* 1999; 88: 437–447. <https://doi.org/10.2466/pms.1999.88.2.437> PMID: 10483636
38. Jones LL, French KE. Effects of contextual interference on acquisition and retention of three volleyball skills. *Percept Mot Skills.* 2007; 105: 883–890. <https://doi.org/10.2466/pms.105.3.883-890> PMID: 18229542
39. Meira CMJ, Tani G. Contextual interference effects assessed by extended transfer trials in the acquisition of the volleyball serve. *J Hum Mov Stud.* 2003; 45: 449–468.
40. Perez CR, Meira CM, Tani G. Does the contextual interference effect last over extended transfer trials? *Percept Mot Skills.* 2005; 100: 58–60. <https://doi.org/10.2466/pms.100.1.58-60> PMID: 15773693
41. Pollock BJ, Lee TD. Dissociated contextual interference effects in children and adults. *Percept Mot Skills.* 1997; 84: 851–8. <https://doi.org/10.2466/pms.1997.84.3.851> PMID: 9172193
42. Saemi E, Porter JM, Varzaneh AG, Zarghami M, Shafinia P. Practicing along the contextual interference continuum: a comparison of three practice schedules in an elementary physical education setting. *Kinesiology.* 2012; 44: 191–198.
43. Stambaugh LA. When repetition isn't the best practice strategy: effects of blocked and random practice schedules. *J Res Music Educ.* SAGE PublicationsSage CA: Los Angeles, CA; 2011; 58: 368–383. <https://doi.org/10.1177/0022429410385945>
44. Wegman E. Contextual interference effects on the acquisition and retention of fundamental motor skills. *Percept Mot Skills.* 1999; 88: 182–187. <https://doi.org/10.2466/pms.1999.88.1.182> PMID: 10214642
45. Wrisberg C, Mead BJ. Developing coincident timing skill in children: a comparison of training methods. *Res Q Exerc Sport.* 1983; 54: 67–74. <https://doi.org/10.1080/02701367.1983.10605274>
46. Zetou E, Michalopoulou M, Giazitzi K, Kioumourtzoglou E. Contextual interference effect in learning volleyball skills. *Percept Mot Skills.* 2007; 104: 995–1004. <https://doi.org/10.2466/pms.104.3.995-1004> PMID: 17688156
47. World Health Organization. ICF-CY International Classification of Functioning, Disability and Health. Children & Youth Version. Geneva, CH: WHO Press, World Health Organization; 2007.

48. Tsutsui S, Lee TD, Hodges NJ. Contextual interference in learning new patterns of bimanual coordination. *J Mot Behav.* 1998; 30: 151–7. <https://doi.org/10.1080/00222899809601332> PMID: 20037030
49. Cauraugh JH, Kim SB. Stroke motor recovery: active neuromuscular stimulation and repetitive practice schedules. *J Neurol Neurosurg Psychiatry.* 2003; 74: 1562–1566. <https://doi.org/10.1136/jnnp.74.11.1562> PMID: 14617717
50. Hanlon RE. Motor learning following unilateral stroke. *Arch Phys Med Rehabil.* 1996; 77.
51. Schweighofer N, Lee J, Goh H, Choi Y, Kim SS, Stewart JC, et al. Mechanisms of the contextual interference effect in individuals poststroke. *J Neurophysiol.* 2011; 106: 2632–2641. <https://doi.org/10.1152/jn.00399.2011> PMID: 21832031
52. Seidler RD, Kwak Y, Fling BW, Bernard JA. Neurocognitive mechanisms of error-based motor learning. *Adv Exp Med Biol.* 2013; 782: 39–60. [https://doi.org/10.1007/978-1-4614-5465-6\\_3](https://doi.org/10.1007/978-1-4614-5465-6_3) PMID: 23296480
53. Krakauer JW, Ghilardi M-F, Ghez C. Independent learning of internal models for kinematic and dynamic control of reaching. *Nat Neurosci.* 1999; 2: 1026–31. <https://doi.org/10.1038/14826> PMID: 10526344
54. Winstein C. Motor learning after unilateral brain damage. *Neuropsychologia.* 1999; 37: 975–987. [https://doi.org/10.1016/S0028-3932\(98\)00145-6](https://doi.org/10.1016/S0028-3932(98)00145-6) PMID: 10426521
55. Gregory E, McCloskey M, Ovans Z, Landau B. Declarative memory and skill-related knowledge: evidence from a case study of amnesia and implications for theories of memory. *Cogn Neuropsychol.* Taylor & Francis; 2016; 33: 220–40. <https://doi.org/10.1080/02643290126042> PMID: 20945204
56. Steinemann NA, Moiseello C, Ghilardi MF, Kelly SP. Tracking neural correlates of successful learning over repeated sequence observations. *Neuroimage.* Elsevier Inc.; 2016; 137: 152–164. <https://doi.org/10.1016/j.neuroimage.2016.05.001> PMID: 27155129
57. McNamee D, Liljeholm M, Zika O, O'Doherty JP. Characterizing the associative content of brain structures involved in habitual and goal-directed actions in humans: a multivariate fMRI study. *J Neurosci.* 2015; 35: 3764–3771. <https://doi.org/10.1523/JNEUROSCI.4677-14.2015> PMID: 25740507
58. Ding Y, Yao B, Lai Q, McAllister JP. Impaired motor learning and diffuse axonal damage in motor and visual systems of the rat following traumatic brain injury. *Neurol Res.* 2001; 23: 193–202. <https://doi.org/10.1179/016164101101198334> PMID: 11320599
59. Bartlett DJ, Palisano RJ. Physical therapists' perceptions of factors influencing the acquisition of motor abilities of children with cerebral palsy: implications for clinical reasoning. *Phys Ther.* 2002; 82: 237–48. <https://doi.org/10.1111/j.1469-8749.1989.tb04072.x> PMID: 11869152
60. The Standards of Reporting Trials Group. A proposal for structured reporting of randomized controlled trials. *J Am Med Assoc.* 1994; 272: 1926–1931.
